# Supplementary material for: Easy access to strongly fluorescent higher homologues of BODIPY
Source: Royal Society of Chemistry journal article supplement (doi:10.1039/d3dt03323f), 2024-01-01
Supplement: d3dt03323f1.pdf [file d3dt03323f1.pdf]

Supplementary Information

## Easy access to strongly fluorescent higher homologues of BODIPY

Lukas Erlemeier,<sup>a</sup> Marius J. Müller,<sup>b</sup> Gina Stuhmann,<sup>c</sup> Tobias Dunaj,<sup>a</sup> Gunnar Werncke,<sup>\*,a</sup>  
Sangam Chatterjee,<sup>b</sup> and Carsten von Hänisch<sup>\*,a</sup>

---

<sup>a</sup> Department of Chemistry, Philipps University Marburg, 35032 Marburg, Germany. E-Mail: carsten.vonhaenisch@chemie.uni-marburg.de.

<sup>b</sup> Institute of Experimental Physics I, Justus Liebig University Giessen, 35392 Giessen, Germany. E-Mail: sangam.chatterjee@physik.uni-giessen.de.

<sup>c</sup> Institute of Nanotechnology (INT) and Karlsruhe Nano Micro Facility (KNMF), Karlsruhe Institute of Technology (KIT), 76344 Eggenstein-Leopoldshafen, Germany.

## Content

|                                                                                                           |    |
|-----------------------------------------------------------------------------------------------------------|----|
| 1. Synthesis and characterization of <sup>Mes</sup> DPM triel dialkyls:.....                              | 3  |
| 1.1 ( <sup>Mes</sup> DPM)AlMe <sub>2</sub> ( <b>2a</b> ):.....                                            | 3  |
| 1.2 ( <sup>Mes</sup> DPM)GaMe <sub>2</sub> ( <b>3a</b> ):.....                                            | 8  |
| 1.3 ( <sup>Mes</sup> DPM)InMe <sub>2</sub> ( <b>4a</b> ):.....                                            | 13 |
| 1.4 ( <sup>Mes</sup> DPM)AlEt <sub>2</sub> ( <b>2b</b> ):.....                                            | 18 |
| 1.5 ( <sup>Mes</sup> DPM)GaEt <sub>2</sub> ( <b>3b</b> ):.....                                            | 23 |
| 1.6 ( <sup>Mes</sup> DPM)InEt <sub>2</sub> ( <b>4b</b> ):.....                                            | 28 |
| 2. UV/Vis and photoluminescence spectra in solution and solid-state: .....                                | 33 |
| 2.1 Solid-state UV/Vis spectra:.....                                                                      | 33 |
| 2.2 UV/Vis spectra in solution: .....                                                                     | 33 |
| 2.3 Comparison of extinction and emission spectra in the vicinity of the HOMO LUMO transition: 34         |    |
| 2.4 Solid-state photoluminescence spectra: .....                                                          | 34 |
| 2.5 Photoluminescence spectra in toluene solution:.....                                                   | 35 |
| 2.6 Spectroscopic data: .....                                                                             | 35 |
| 3. Crystallographic data:.....                                                                            | 36 |
| 3.1 ( <sup>Mes</sup> DPM)H ( <b>1</b> ): .....                                                            | 36 |
| 3.2 ( <sup>Mes</sup> DPM)AlMe <sub>2</sub> ( <b>2a</b> ):.....                                            | 37 |
| 3.3 ( <sup>Mes</sup> DPM)GaMe <sub>2</sub> ( <b>3a</b> ):.....                                            | 38 |
| 3.4 ( <sup>Mes</sup> DPM)InMe <sub>2</sub> ( <b>4a</b> ):.....                                            | 39 |
| 3.5 ( <sup>Mes</sup> DPM)AlEt <sub>2</sub> ( <b>2b</b> ):.....                                            | 40 |
| 3.6 ( <sup>Mes</sup> DPM)GaEt <sub>2</sub> ( <b>3b</b> ):.....                                            | 41 |
| 3.7 ( <sup>Mes</sup> DPM)InEt <sub>2</sub> ( <b>4b</b> ):.....                                            | 42 |
| 4. XYZ coordinates of 2a, 3a and 4a obtained from geometry optimisation by the r2scan-3c method.<br>..... | 43 |

## 1. Synthesis and characterization of <sup>Mes</sup>DPM triel dialkyls:

### General procedure:

At room temperature 0.15 g (<sup>Mes</sup>DPM)H (**1**, 0.30 mmol, 1.00 eq.) were suspended in 10 mL toluene under stirring. To this suspension MR<sub>3</sub> (M = Al-In; R = Me, Et) (0.30 mmol, 1.00 eq.) was added dropwise. The reaction mixture was stirred at room temperature for 16 h. Evaporation of the solvent and drying under reduced pressure at 85 °C afforded the desired products ((<sup>Mes</sup>DPM)MR<sub>2</sub> (M = Al-In; R = Me, Et)) as red/orange solids in almost quantitative yield between 95 and 98%.

#### 1.1 (<sup>Mes</sup>DPM)AlMe<sub>2</sub> (**2a**):

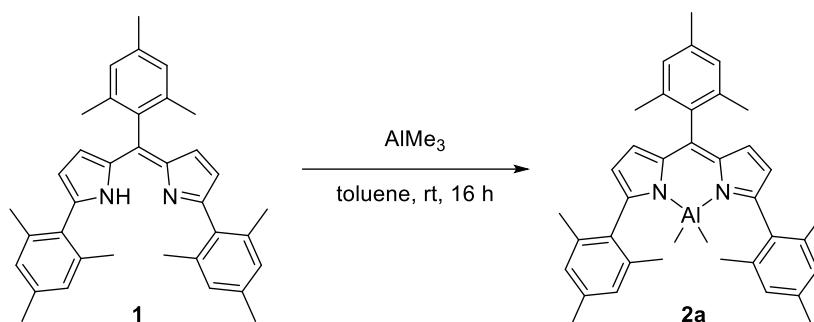

<sup>1</sup>H-NMR (300.19 MHz, C<sub>6</sub>D<sub>6</sub>) δ = 6.80 (s, 2 H, -CH(Mes)), 6.75 (s, 4 H, -CH(Mes)), 6.72 (d, <sup>3</sup>J<sub>AB</sub> = 4.0 Hz, 2 H, -CH(py)), 6.08 (d, <sup>3</sup>J<sub>AB</sub> = 4.0 Hz, 2 H, -CH(py)), 2.21 (s, 3 H, -Me), 2.20 (s, 6 H, -Me), 2.19 (s, 12 H, -Me), 2.07 (s, 6 H, -Me), -0.72 (s, 6 H, -AlMe) ppm.

<sup>13</sup>C{<sup>1</sup>H}-NMR (75.48 MHz, C<sub>6</sub>D<sub>6</sub>) δ = 162.22 (s, 2 C, C<sub>quart</sub> (pyr)), 146.37 (s, 1 C, C<sub>quart</sub>), 138.97 (s, 2 C, C<sub>quart</sub> (Mes)), 138.69 (s, 2 C, C<sub>quart</sub> (Mes)), 137.83 (s, 1 C, C<sub>quart</sub> (Mes)), 137.70 (s, 4 C, C<sub>quart</sub> (Mes)), 136.82 (s, 2 C, C<sub>quart</sub> (Mes)), 134.64 (s, 1 C, C<sub>quart</sub> (Mes)), 132.55 (s, 2 C, -CH (pyr)), 131.70 (s, 2 C, C<sub>quart</sub> (pyr)), 128.25 (s, 6 C, -CH(Mes)), 120.09 (s, 2 C, -CH (pyr)), 21.20 (s, 1 C, -Me), 21.19 (s, 2 C, -Me), 20.71 (s, 4 C, -Me), 19.91 (s, 2 C, -Me), -8.54 (s, 2 C, -AlMe) ppm.

IR (cm<sup>-1</sup>) ν = 2920.63 (m, br), 1611.02 (m), 1551.26 (s), 1460.66 (m), 1378.87 (m), 1331.79 (m), 1313.59 (w), 247.56 (s), 1211.65 (m), 1178.35 (m), 1078.57 (m), 1051.83 (m), 1009.81 (s), 917.85 (m), 889.75 (w), 866.07 (m), 854.07 (m), 841.95 (m), 793.08 (m), 737.46 (m), 727.29 (m), 698.13 (m), 669.49 (m), 620.62 (m), 580.41 (m), 467.74 (w), 449.40 (w), 426.32 (m).

MS (HR-Cl<sup>+</sup>) (m/z (%)) calculated for [C<sub>38</sub>H<sub>44</sub>N<sub>2</sub>Al<sub>1</sub>]<sup>+</sup>: 555.33199.; found: 555.33318 (25.24); calculated for [C<sub>37</sub>H<sub>40</sub>N<sub>2</sub>Al<sub>1</sub>]<sup>+</sup>: 539.30069.; found: 539.30072 (100.0).

CHNS calculated: C = 82.27%, H = 7.81%, N = 5.05%; found: C = 81.47%, H = 7.573%, N = 5.07%.

SS-UV/Vis (BaSO<sub>4</sub>): λ<sub>max,ss</sub> = 509 nm (FWHM = 91 nm).

UV/Vis (toluene): λ<sub>max</sub> = 504 nm (FWHM = 20 nm), ε<sub>max</sub> (504 nm) = 1.27·10<sup>5</sup> L mol<sup>-1</sup> cm<sup>-1</sup>.

Excitation/Emission (toluene): λ<sub>Ex</sub> = 339 nm; λ<sub>Em</sub> = 521 nm.

SS-PL (λ<sub>Ex</sub> = 325 nm): λ<sub>F,ss</sub> = 562 nm; φ<sub>F,ss</sub> = 34%.

PL (toluene, λ<sub>Ex</sub> = 405 nm): λ<sub>F</sub> = 540 nm; φ<sub>F</sub> = 44%.

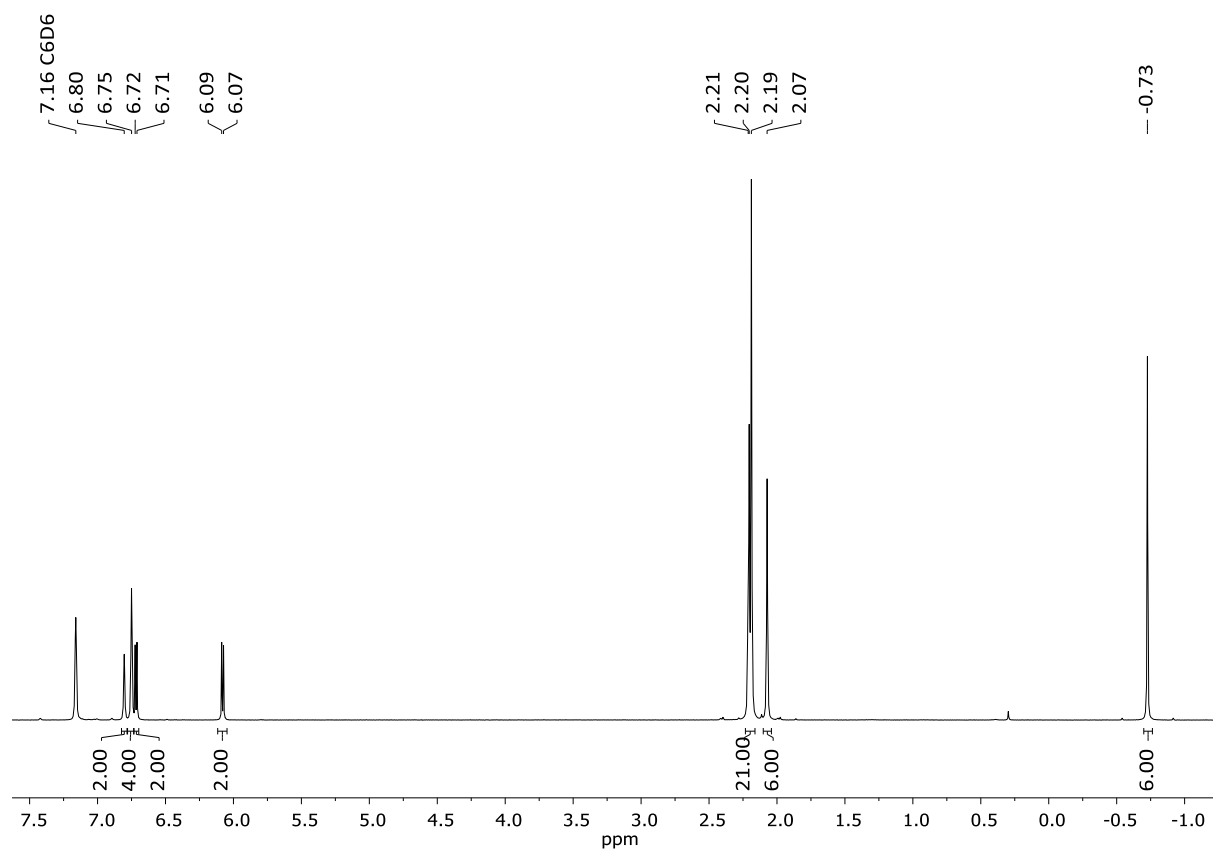

Figure 1:  $^1\text{H}$  NMR spectrum of compound 2a in  $\text{C}_6\text{D}_6$  at 300 K.

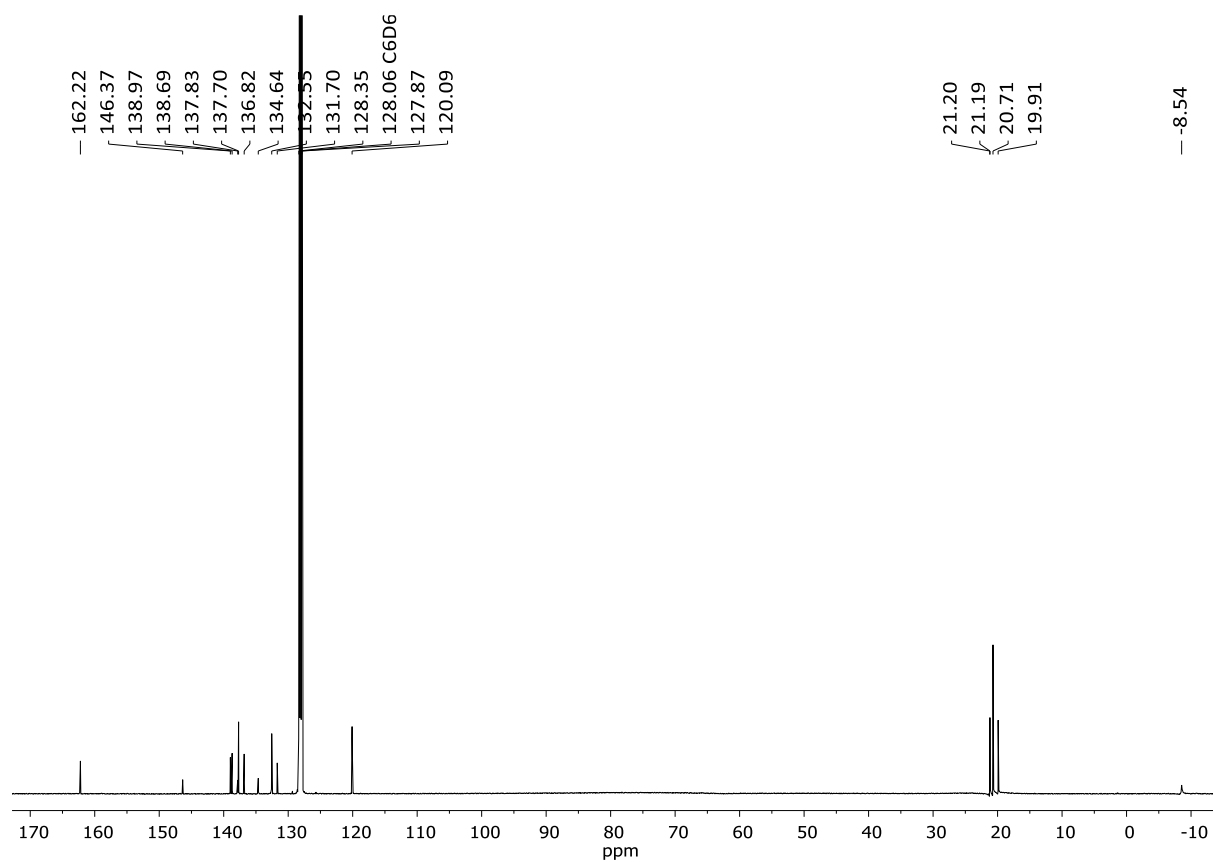

Figure 2:  $^{13}\text{C}$  NMR spectrum of compound 2a in  $\text{C}_6\text{D}_6$  at 300 K.

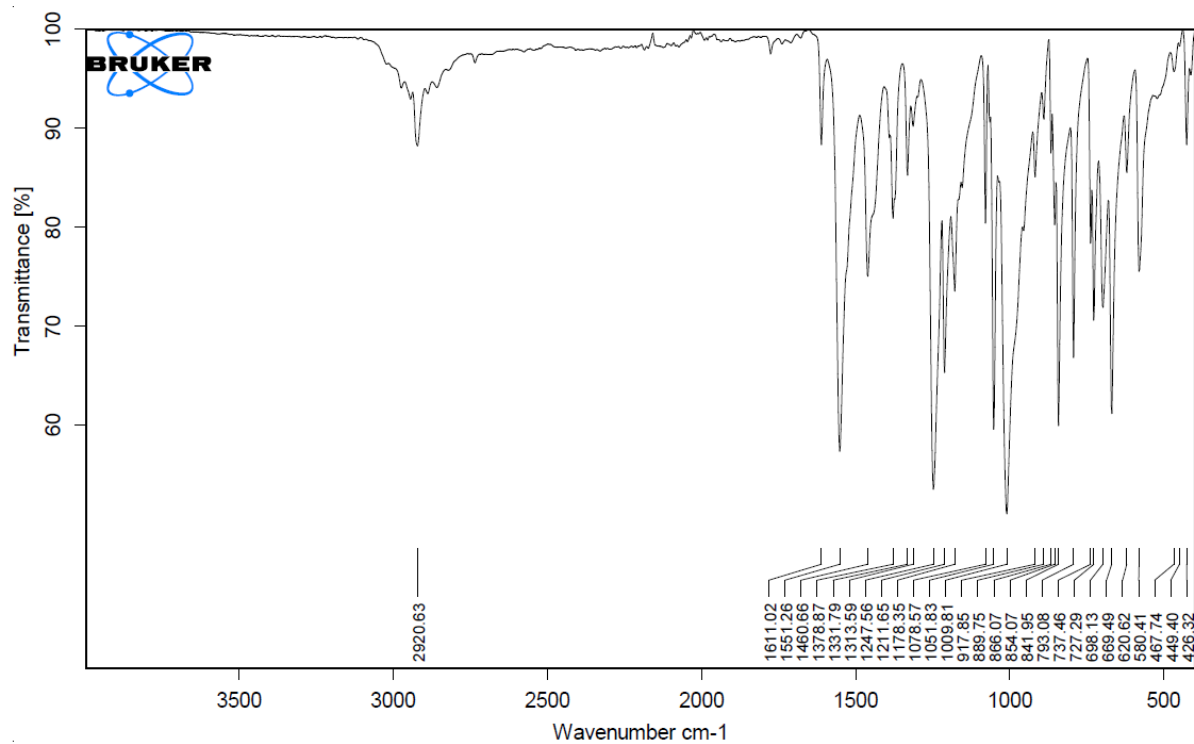

**Figure 3: IR spectrum of compound 2a.**

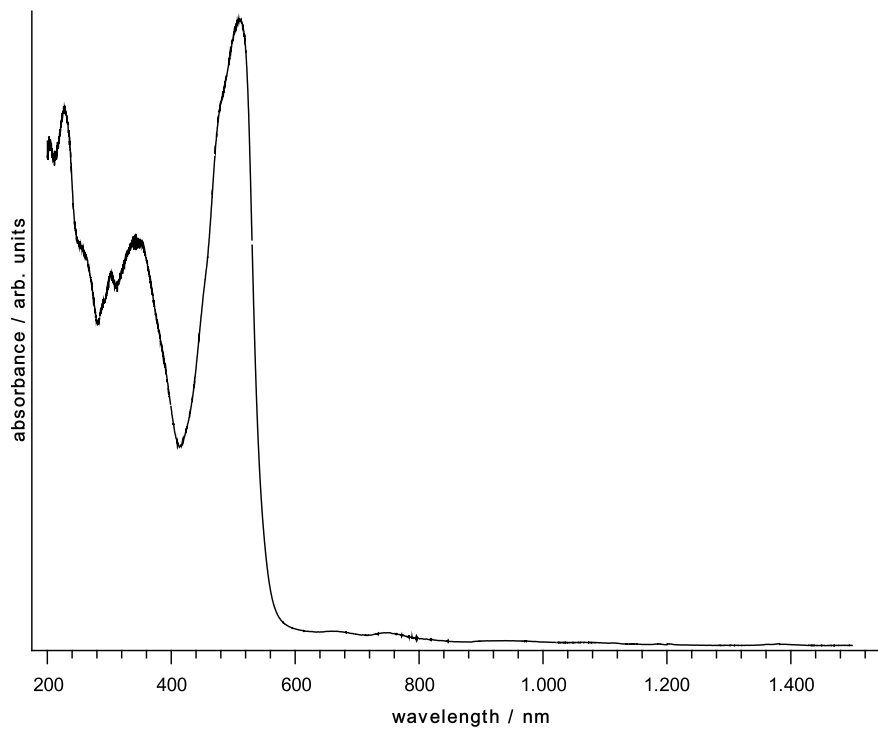

**Figure 4: Solid-state UV/VIS spectrum of compound 2a.**

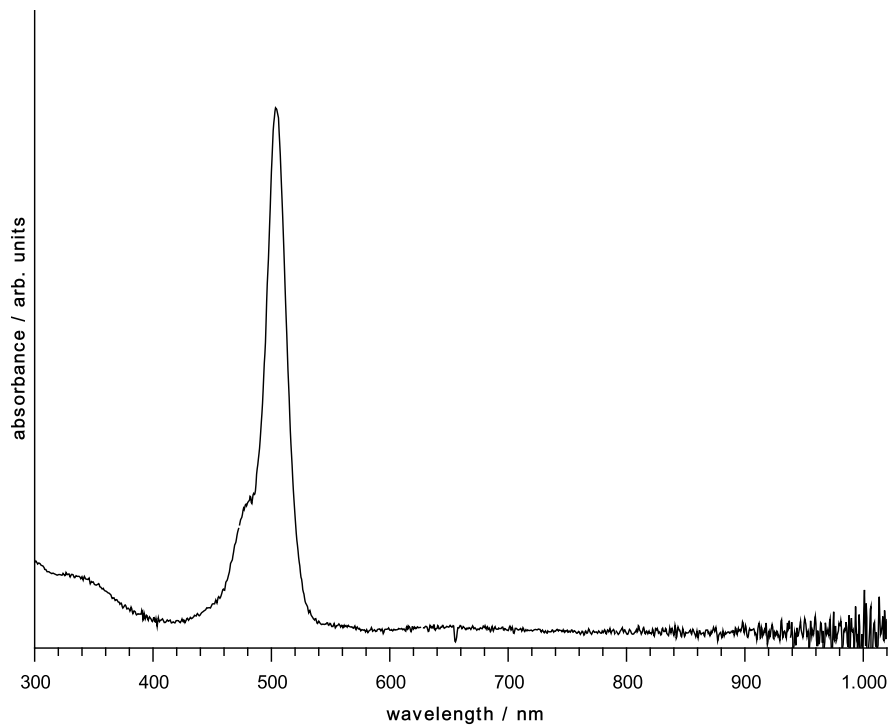

**Figure 5: Solution-state UV/VIS spectrum of compound 2a (2  $\mu\text{M}$  in toluene).**

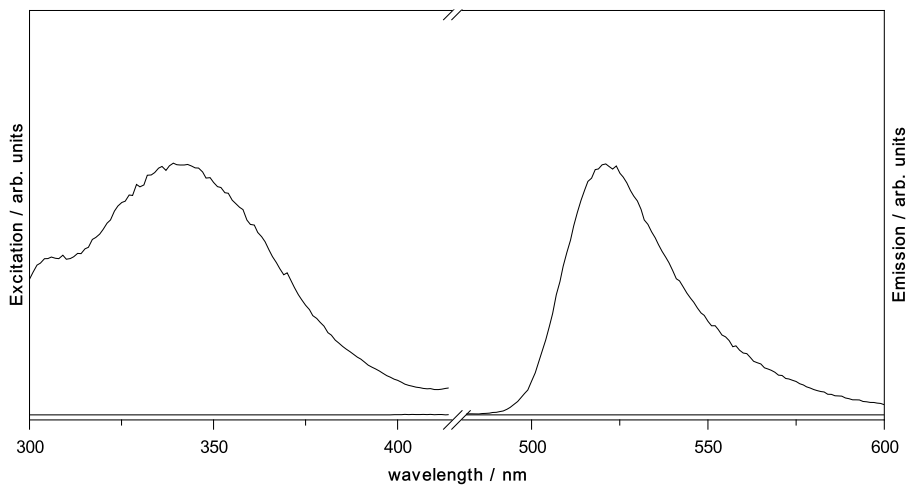

**Figure 6: Excitation spectrum of 2a in toluene with emission detected at  $\lambda_F$  (left); emission spectra obtained with excitation detected at  $\lambda_{Ex}$  (right).**

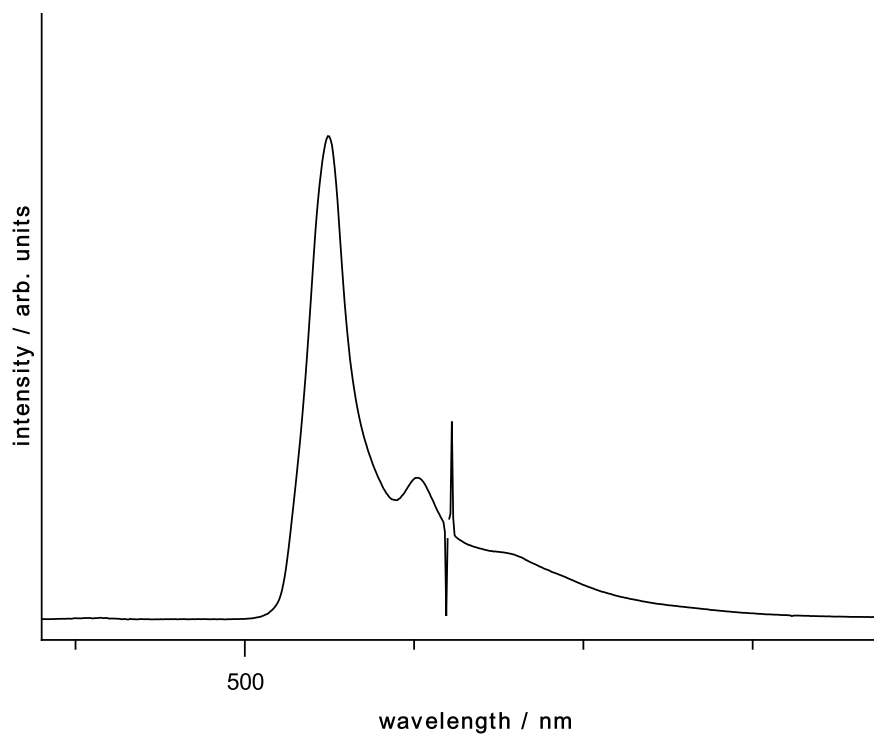

**Figure 7:** Solid-state PL spectrum of compound 2a. Excitation with 325 nm He-Cd continuous wave laser (the signal at 650 nm is the second diffraction order of the laser).

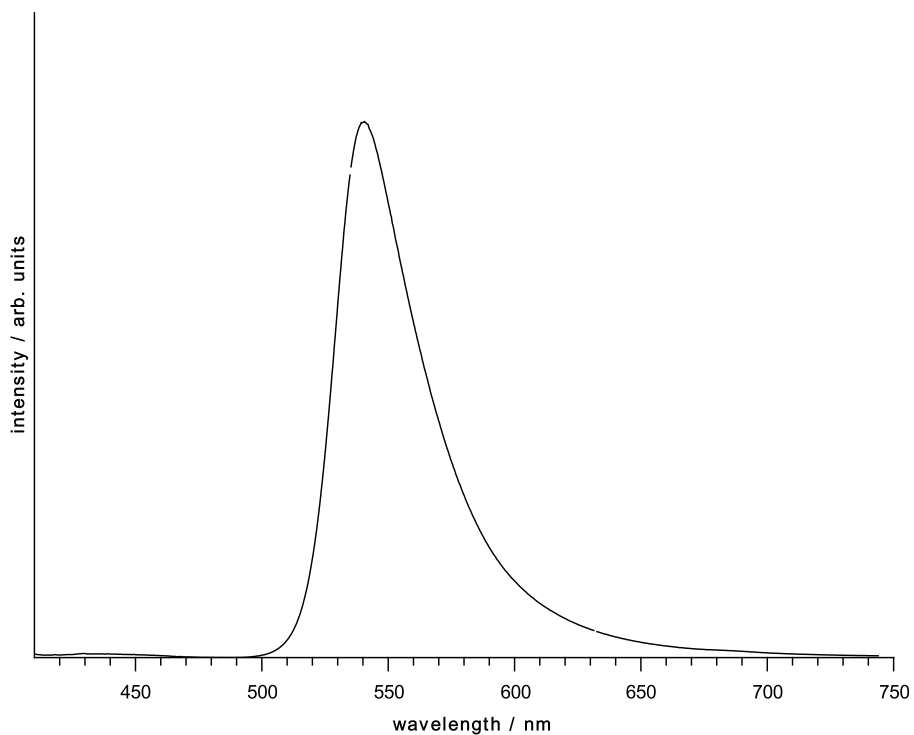

**Figure 8:** Solution-state PL spectrum of compound 2a in toluene. Excitation with 405 nm continuous wave diode laser.

1.2 (<sup>Mes</sup>DPM)GaMe<sub>2</sub> (**3a**):

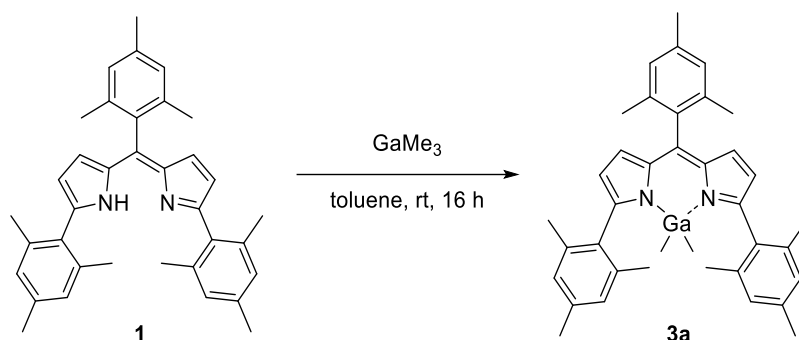

<sup>1</sup>H-NMR (300.19 MHz, C<sub>6</sub>D<sub>6</sub>) δ = 6.82 (s, 2 H, -CH(Mes)), 6.77 (d, <sup>3</sup>J<sub>AB</sub> = 4.0 Hz, 2 H, -CH(py)), 6.75 (s, 4 H, -CH(Mes)), 6.12 (d, <sup>3</sup>J<sub>AB</sub> = 4.1 Hz, 2 H, -CH(py)), 2.24 (s, 6 H, -Me), 2.22 (s, 3 H, -Me), 2.16 (s, 12 H, -Me), 2.08 (s, 6 H, -Me), -0.38 (s, 6 H, -AlMe) ppm.

<sup>13</sup>C{<sup>1</sup>H}-NMR (75.48 MHz, C<sub>6</sub>D<sub>6</sub>) δ = 161.03 (s, 2 C, C<sub>quart</sub> (pyr)), 148.53 (s, 1 C, C<sub>quart</sub>), 138.44 (s, 2 C, C<sub>quart</sub> (Mes)), 138.28 (s, 2 C, C<sub>quart</sub> (Mes)), 137.64 (s, 1 C, C<sub>quart</sub> (Mes)), 137.61 (s, 4 C, C<sub>quart</sub> (Mes)), 136.88 (s, 2 C, C<sub>quart</sub> (Mes)), 135.29 (s, 1 C, C<sub>quart</sub> (Mes)), 132.22 (s, 2 C, C<sub>quart</sub> (pyr)), 131.92 (s, 2 C, -CH (pyr)), 128.20 (s, 6 C, -CH (Mes)), 119.29 (s, 2 C, -CH (pyr)), 21.21 (s, 1 C, -Me), 21.18 (s, 2 C, -Me), 20.67 (s, 4 C, -Me), 19.96 (s, 2 C, -Me), -5.85 (s, 2 C, -GaMe) ppm.

IR (cm<sup>-1</sup>) ν = 2952.06 (w), 2919.98 (m), 2857.41 (w), 1610.78 (m), 1549.48 (s), 1461.36 (m), 1374.92 (m), 1335.52 (m), 1312.51 (w), 1252.05 (s), 1216.93 (m), 1187.15 (m), 1076.84 (w), 1050.61 (m), 1004.73 (s), 916.50 (m), 887.28 (w), 865.45 (m), 853.60 (m), 839.65 (s), 789.05 (m), 750.42 (m), 730.45 (m), 676.32 (m), 620.15 (w), 582.83 (w), 566.09 (m), 536.48 (m), 468.24 (w), 412.12 (m).

MS (HR-Cl<sup>+</sup>) (m/z (%)) calculated for [C<sub>38</sub>H<sub>44</sub>N<sub>2</sub>Ga<sub>1</sub>]<sup>+</sup>: 597.27603; found: 597.27602 (13.54); calculated for [C<sub>37</sub>H<sub>40</sub>N<sub>2</sub>Ga<sub>1</sub>]<sup>+</sup>: 581.24473.; found: 581.24546 (32.17).

CHNS: calculated: C = 76.39%, H = 7.25%, N = 4.69%; found: C = 76.48%, H = 6.923%, N = 4.77%.

UV/Vis (BaSO<sub>4</sub>): λ<sub>max,ss</sub> = 502 nm (FWHM = 110 nm).

UV/Vis (toluene): λ<sub>max</sub> = 500 nm (FWHM = 21 nm), ε<sub>max</sub> (500 nm) = 1.30·10<sup>5</sup> L mol<sup>-1</sup> cm<sup>-1</sup>.

Excitation/Emission (toluene): λ<sub>Ex</sub> = 337 nm; λ<sub>Em</sub> = 517 nm.

SS-PL (λ<sub>Ex</sub> = 325 nm): λ<sub>F,ss</sub> = 562 nm; φ<sub>F,ss</sub> = 33%.

PL (toluene, λ<sub>Ex</sub> = 405 nm): λ<sub>F</sub> = 539 nm; φ<sub>F</sub> = 51%.



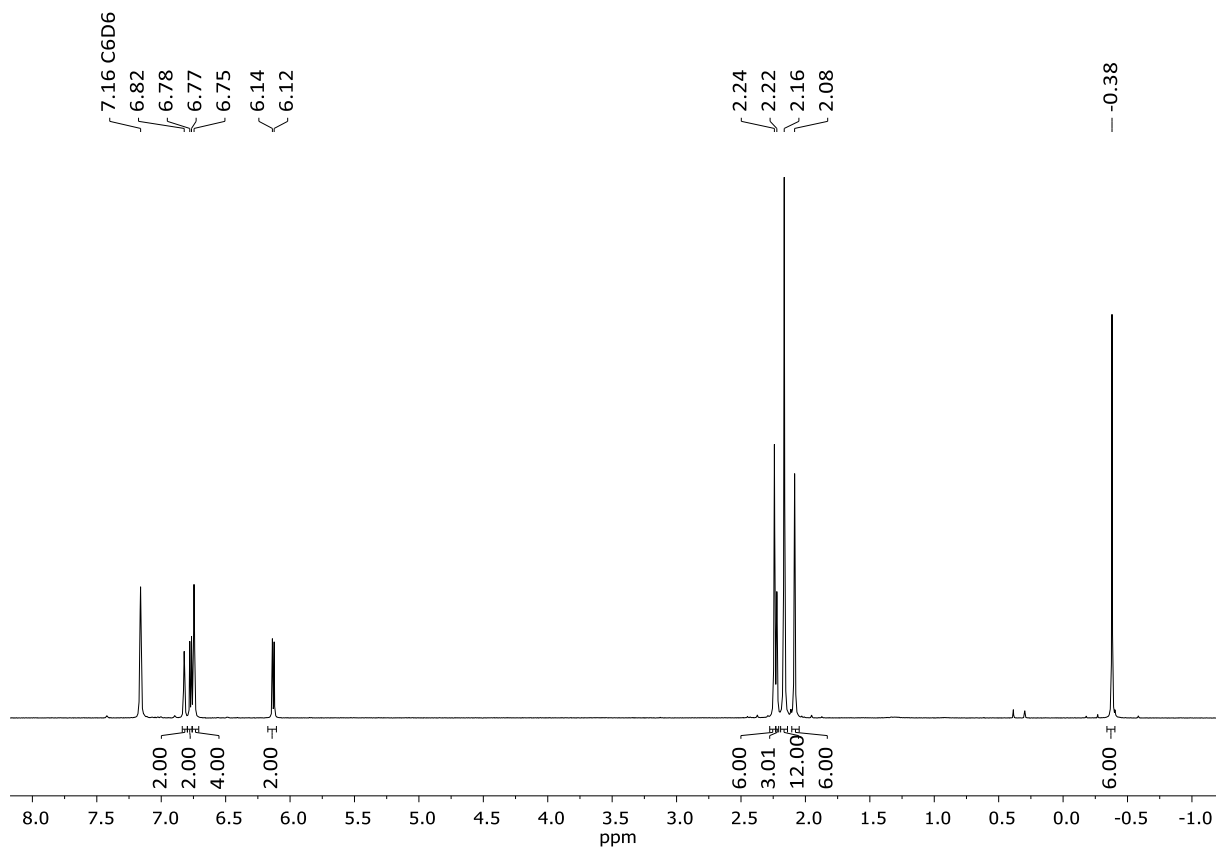

Figure 9:  $^1\text{H}$  NMR spectrum of compound **3a** in  $\text{C}_6\text{D}_6$  at 300 K.

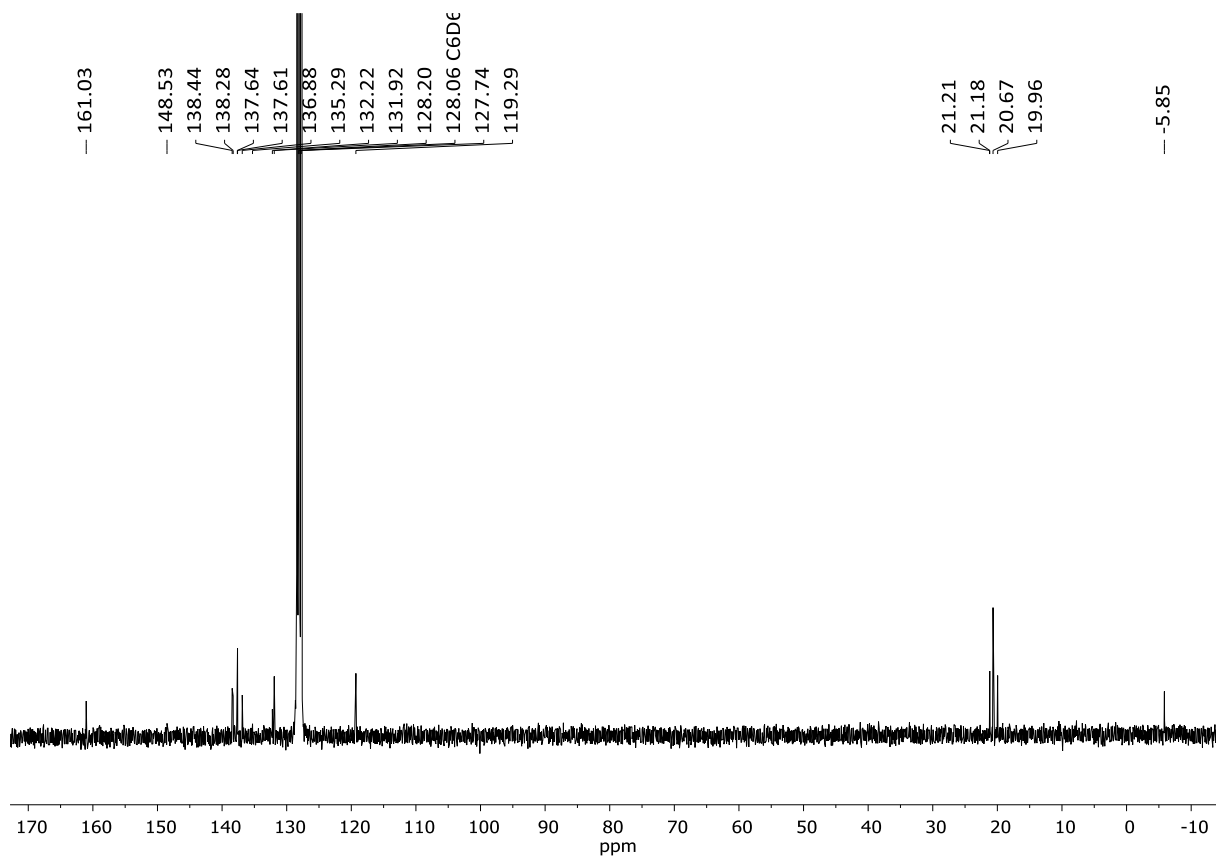

Figure 10:  $^{13}\text{C}$  NMR spectrum of compound **3a** in  $\text{C}_6\text{D}_6$  at 300 K.

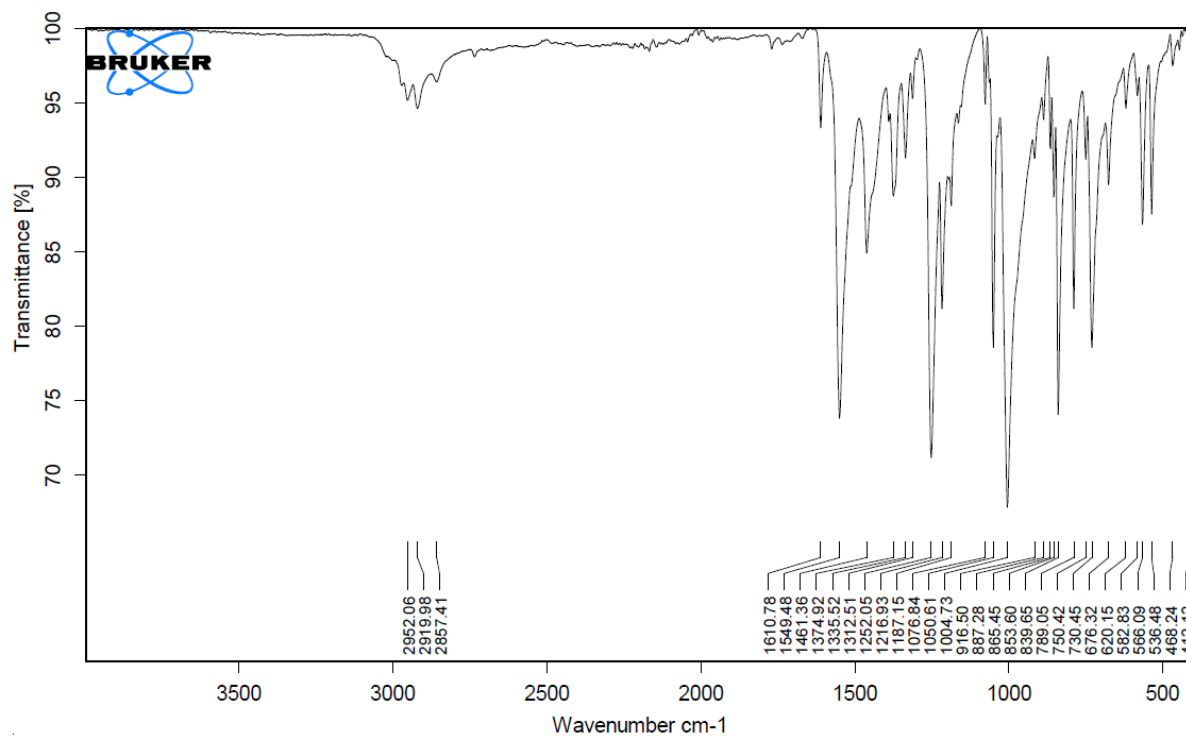

Figure 11: IR spectrum of compound 3a.

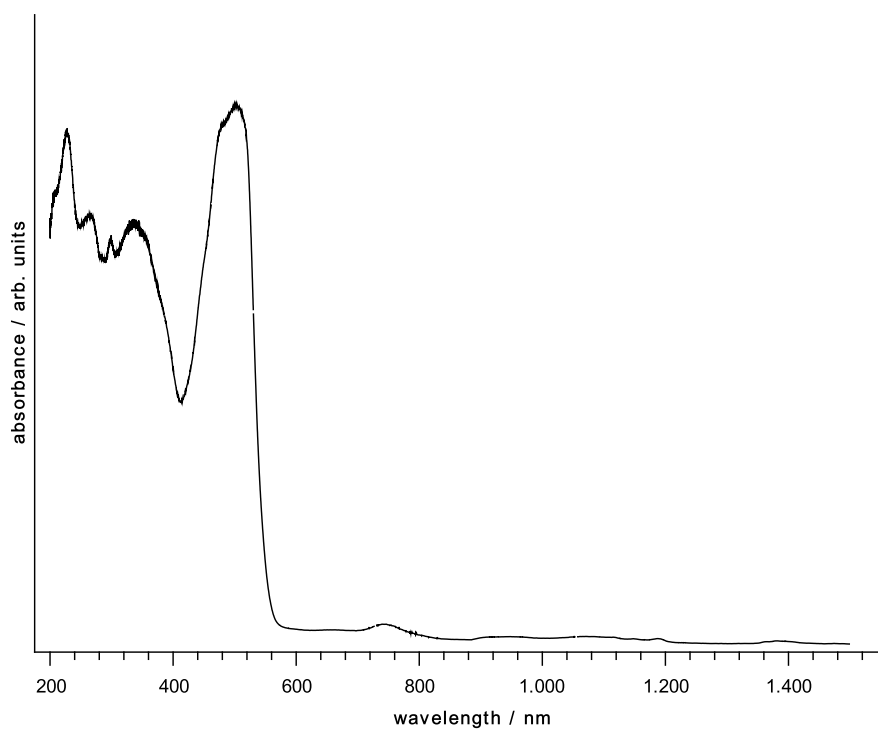

Figure 12: Solid-state UV/VIS spectrum of compound 3a.

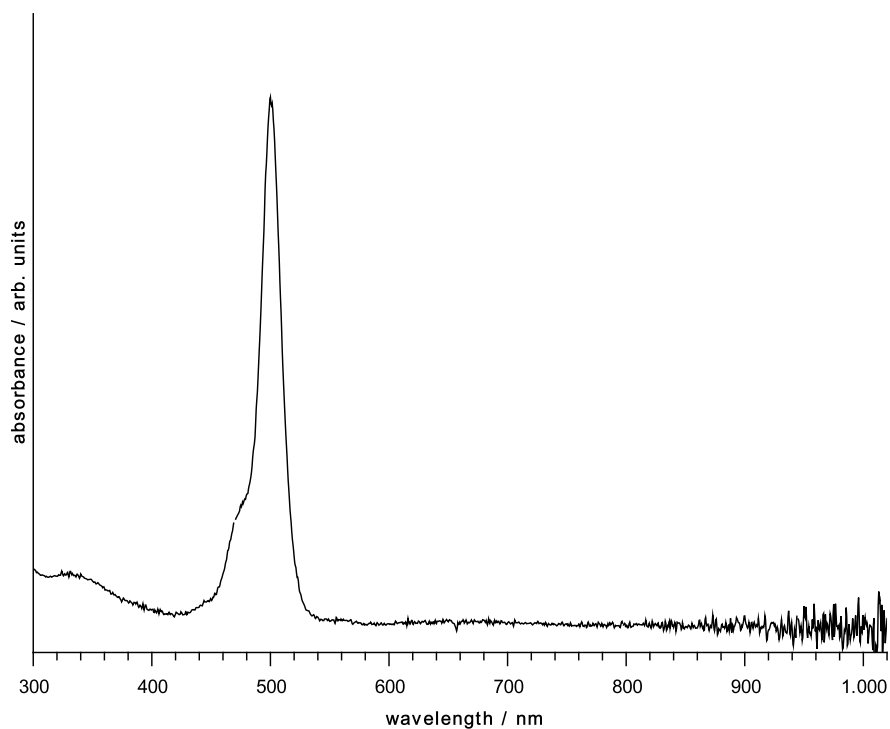

**Figure 13: Solution-state UV/VIS spectrum of compound 3a (2  $\mu\text{M}$  in toluene).**

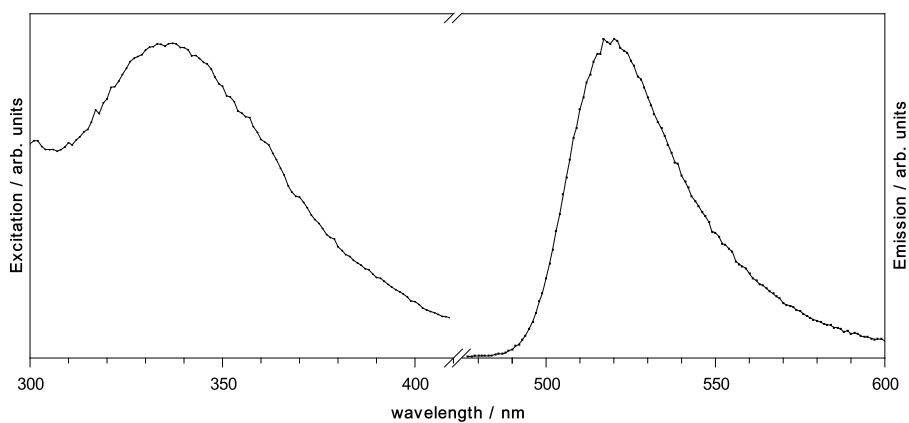

**Figure 14: Excitation spectrum of 3a in toluene with emission detected at  $\lambda_F$  (left); emission spectra obtained with excitation detected at  $\lambda_{Ex}$  (right).**

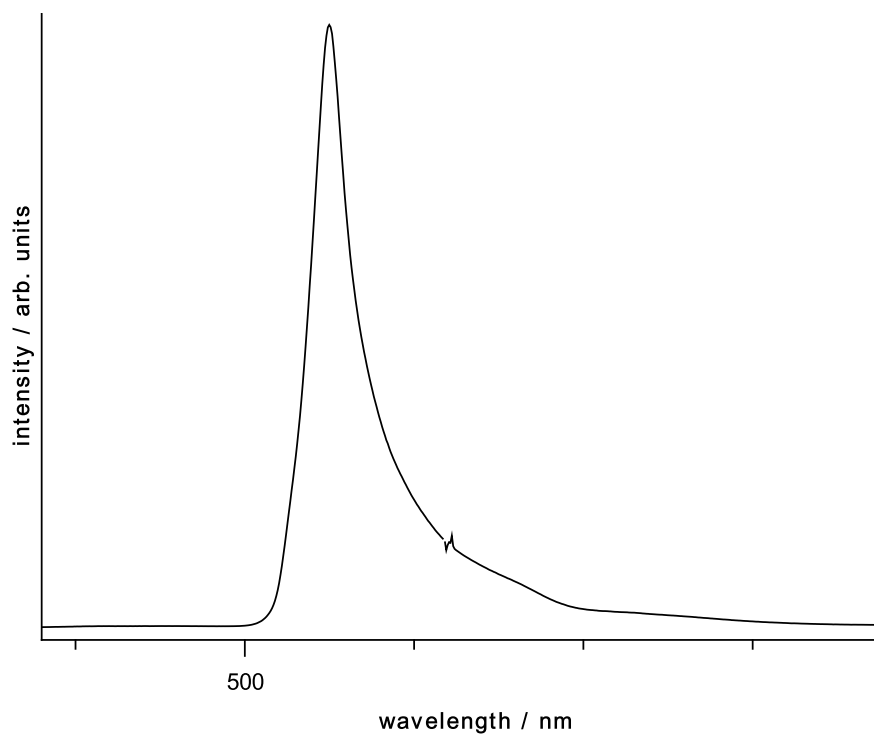

**Figure 15:** Solid-state PL spectrum of compound 3a. Excitation with 325 nm He-Cd continuous wave laser (the signal at 650 nm is the second diffraction order of the laser).

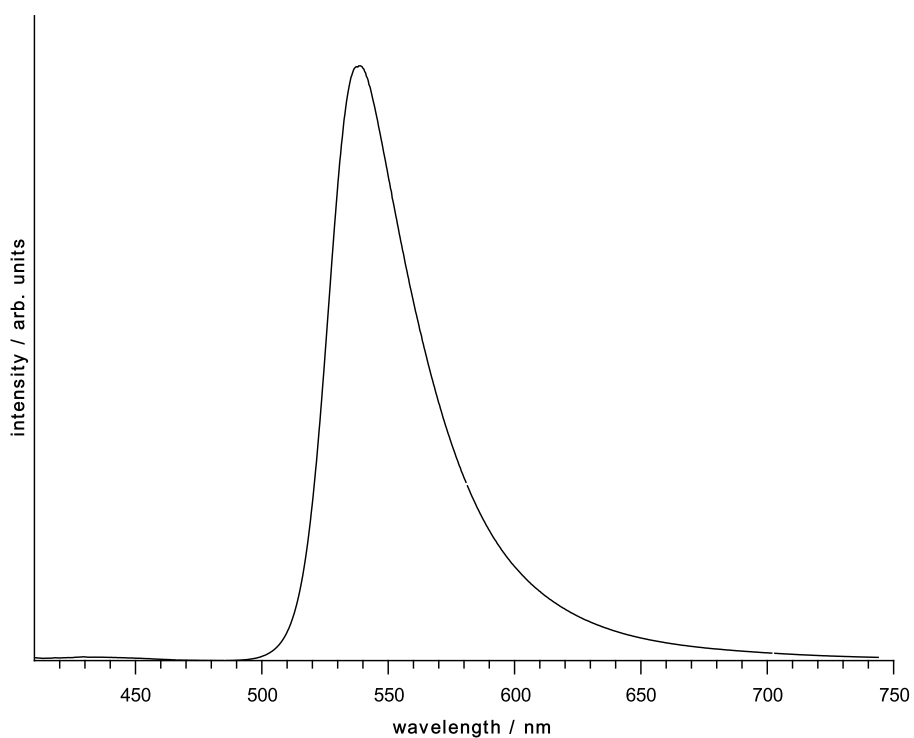

**Figure 16:** Solution-state PL spectrum of compound 3a in toluene. Excitation with 405 nm continuous wave diode laser.

1.3 (<sup>Mes</sup>DPM)InMe<sub>2</sub> (**4a**):

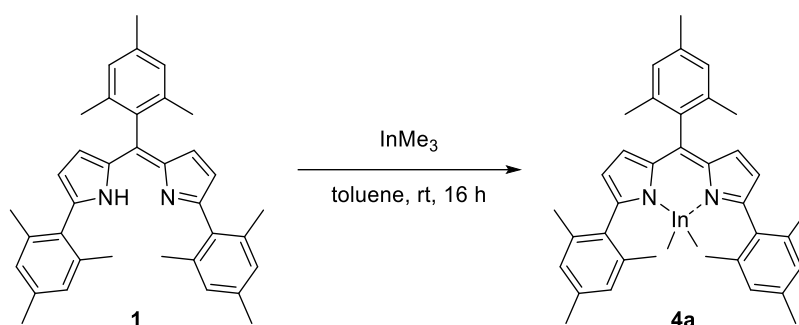

<sup>1</sup>H-NMR (300.19 MHz, C<sub>6</sub>D<sub>6</sub>)  $\delta$  = 6.83 (s, 2 H, -CH(Mes)), 6.83 (d, <sup>3</sup>J<sub>AB</sub> = 43.9 Hz, 2 H, -CH(py)), 6.74 (s, 4 H, -CH(Mes)), 6.18 (d, <sup>3</sup>J<sub>AB</sub> = 4.0 Hz, 2 H, -CH(py)), 2.27 (s, 6 H, -Me), 2.23 (s, 3 H, -Me), 2.15 (s, 12 H, -Me), 2.07 (s, 6 H, -Me), -0.29 (s, 6 H, -InMe) ppm.

<sup>13</sup>C{<sup>1</sup>H}-NMR (75.48 MHz, C<sub>6</sub>D<sub>6</sub>)  $\delta$  = 161.36 (s, 2 C, C<sub>quart</sub> (pyr)), 146.48 (s, 1 C, C<sub>quart</sub>), 139.37 (s, 2 C, C<sub>quart</sub> (Mes)), 138.49 (s, 2 C, C<sub>quart</sub> (Mes)), 137.66 (s, 4 C, C<sub>quart</sub> (Mes)), 137.37 (s, 1 C, C<sub>quart</sub> (Mes)), 136.91 (s, 2 C, C<sub>quart</sub> (Mes)), 136.53 (s, 1 C, C<sub>quart</sub> (Mes)), 132.94 (s, 2 C, -CH (pyr)), 132.89 (s, 2 C, C<sub>quart</sub> (pyr)), 128.23 (s, 4 C, -CH (Mes)), 127.92 (s, 2 C, -CH (Mes)), 118.64 (s, 2 C, -CH (pyr)), 21.23 (s, 1 C, -Me), 21.17 (s, 2 C, -Me), 20.55 (s, 4 C, -Me), 20.01 (s, 2 C, -Me), -7.35 (s, 2 C, -InMe) ppm.

IR (cm<sup>-1</sup>)  $\nu$  = 2968.70 (w), 2916.43 (m), 2855.30 (w), 2163.36 (w), 1610.75 (m), 1544.28 (s), 1461.60 (m), 1363.12 (m), 1334.37 (m), 1307.93 (w), 1248.87 (s), 1219.00 (m), 1148.72 (m), 1076.43 (w), 1049.10 (m), 1000.18 (s), 13.97 (m), 886.70 (w), 864.45 (m), 851.89 (m), 838.79 (s), 786.71 (m), 727.24 (m), 662.11 (m), 618.95 (w), 572.27 (w), 502.58 (m), 481.82 (m), 407.90 (w).

MS (HR-Cl<sup>+</sup>) (m/z (%)) calculated for [C<sub>38</sub>H<sub>44</sub>N<sub>2</sub>In<sub>1</sub>]<sup>+</sup>: 643.25433; found: 643.25263 (39.58); calculated for [C<sub>37</sub>H<sub>40</sub>N<sub>2</sub>In<sub>1</sub>]<sup>+</sup>: 627.22303; found: 627.22203 (100.0).

CHNS: calculated: C = 71.03%, H = 6.75%, N = 4.36%; found: C = 71.20%, H = 6.556%, N = 4.43%.

UV/Vis (BaSO<sub>4</sub>):  $\lambda_{max,ss}$  = 509 nm (FWHM = 95 nm).

UV/Vis (toluene):  $\lambda_{max}$  = 499 nm (FWHM = 26 nm),  $\epsilon_{max}$  (499 nm) = 1.43 · 10<sup>5</sup> L mol<sup>-1</sup> cm<sup>-1</sup>.

Excitation/Emission (toluene):  $\lambda_{Ex}$  = 327 nm;  $\lambda_{Em}$  = 529 nm.

SS-PL ( $\lambda_{Ex}$  = 325 nm):  $\lambda_{F,ss}$  = 557 nm;  $\varphi_{F,ss}$  = 3 %.

PL (toluene,  $\lambda_{Ex}$  = 405 nm):  $\lambda_F$  = 540 nm;  $\varphi_F$  = 2 %.

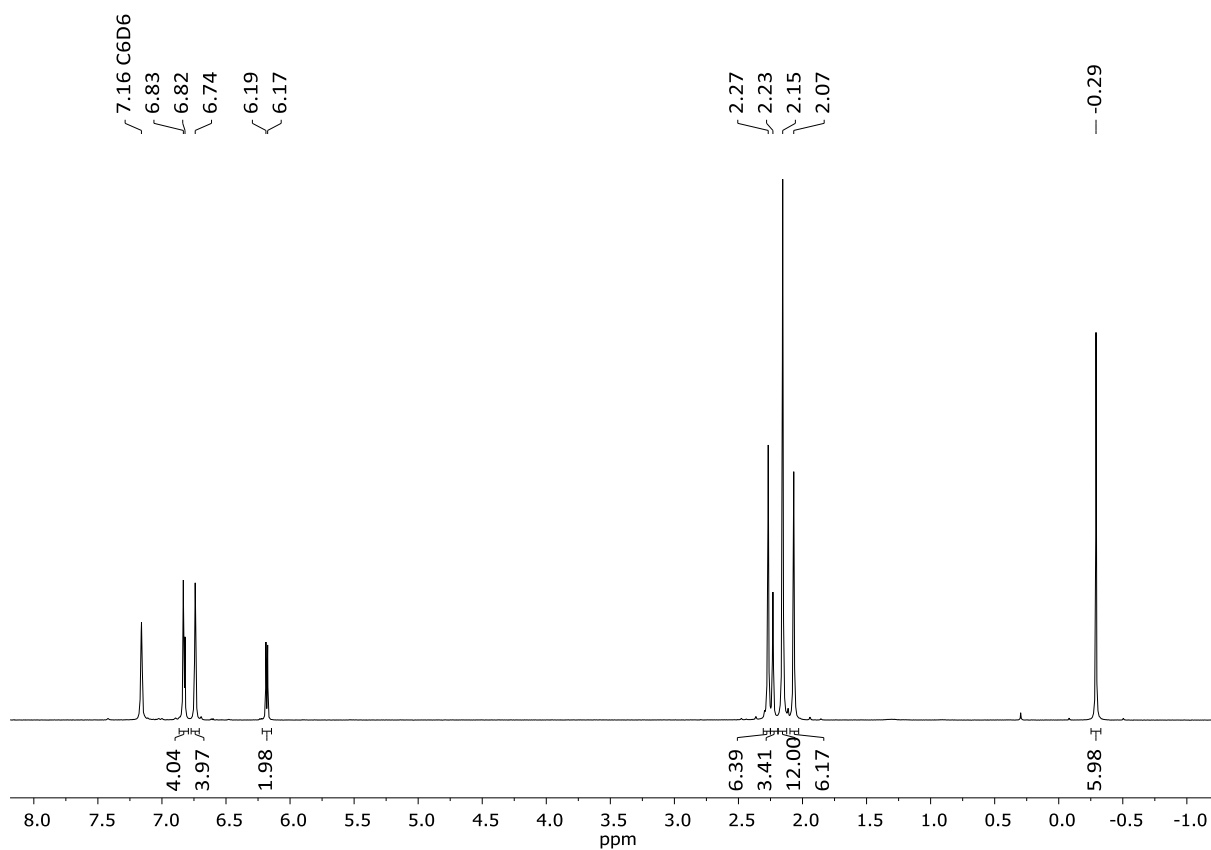

Figure 17:  $^1\text{H}$  NMR spectrum of compound 4a in  $\text{C}_6\text{D}_6$  at 300 K.

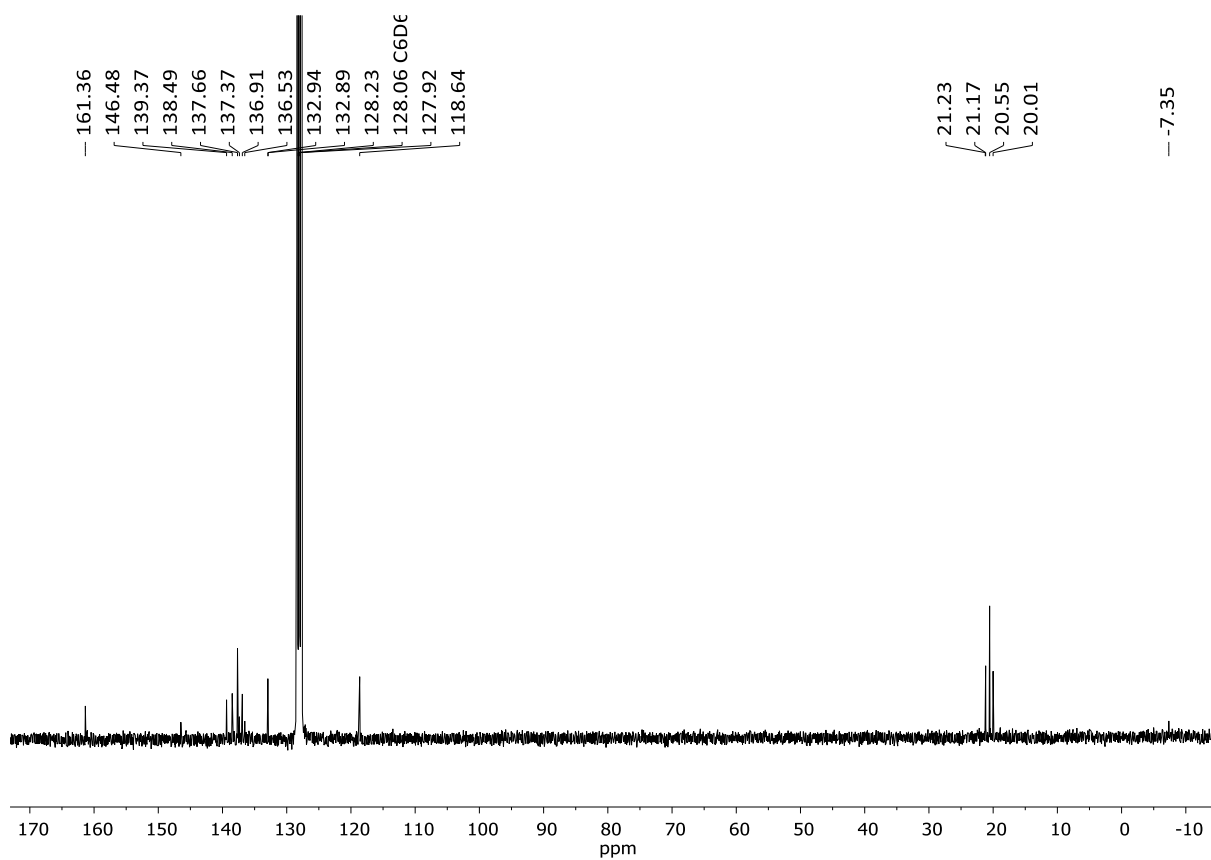

Figure 18:  $^{13}\text{C}$  NMR spectrum of compound 4a in  $\text{C}_6\text{D}_6$  at 300 K.

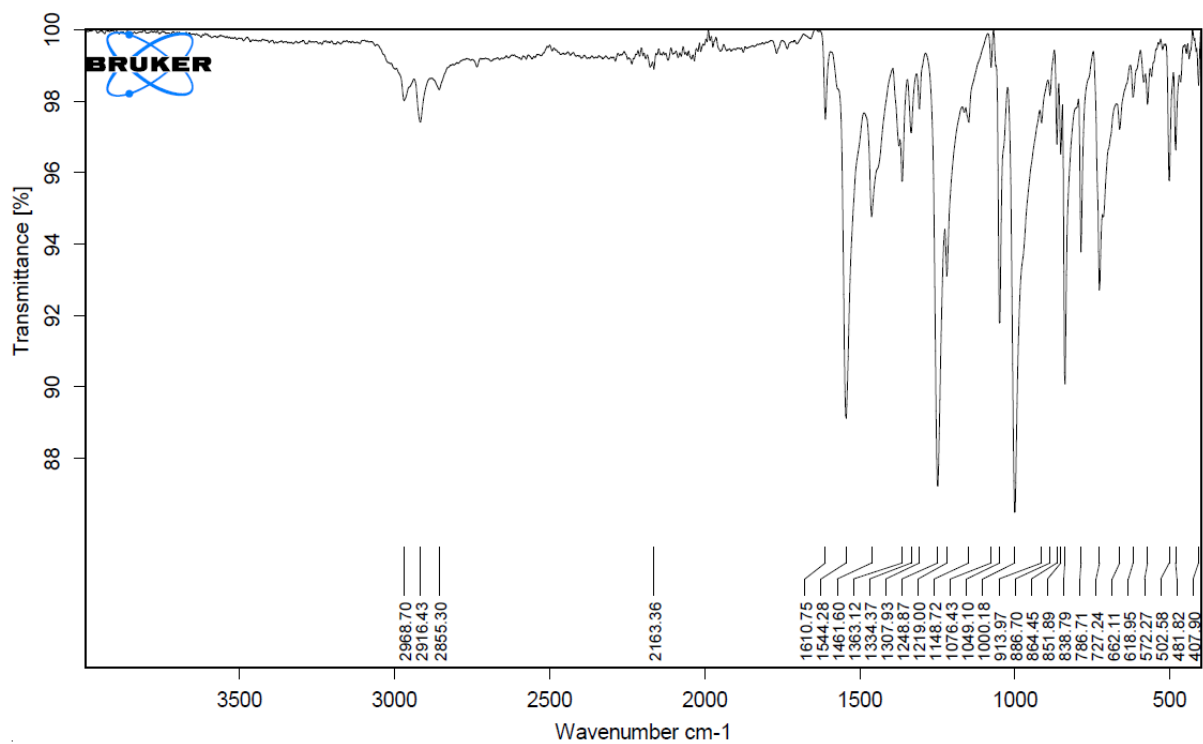

Figure 19: IR spectrum of compound 4a.

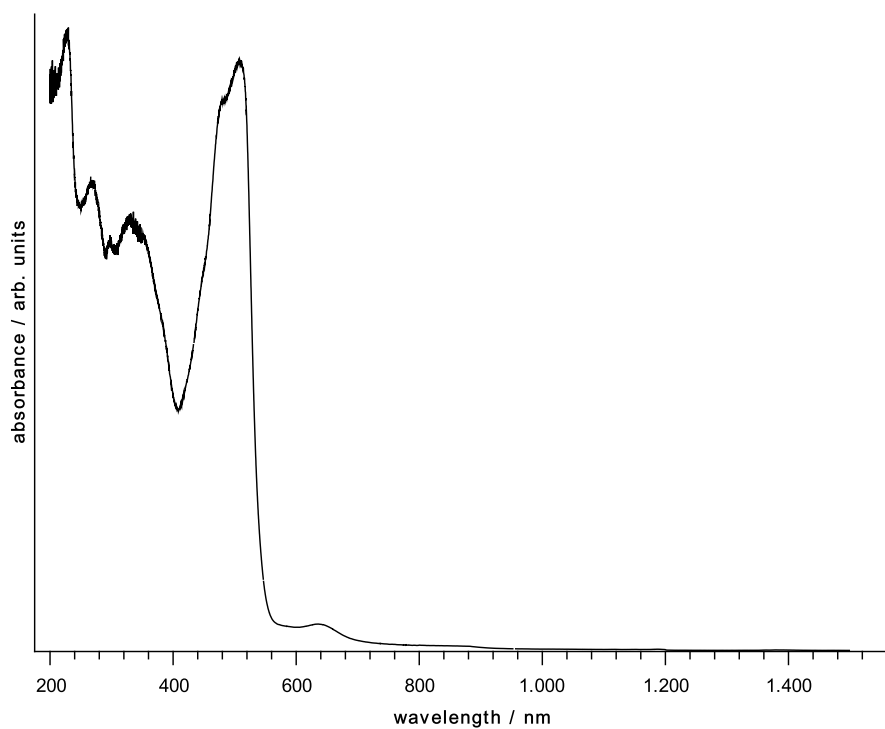

Figure 20: Solid state UV/VIS spectrum of compound 4a.

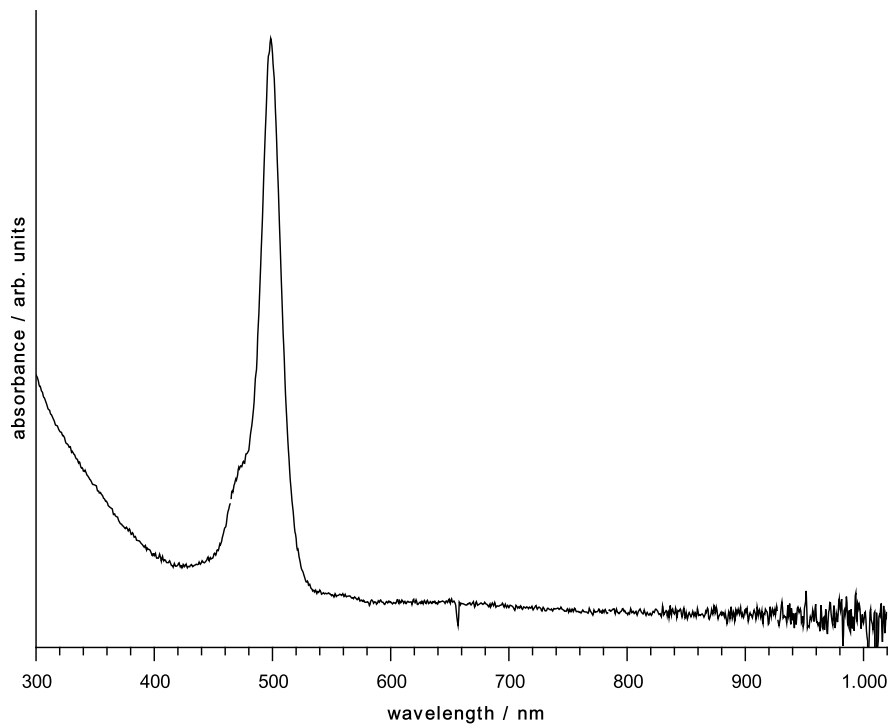

**Figure 21: Solution-state UV/VIS spectrum of compound 4a (2  $\mu\text{M}$  in toluene).**

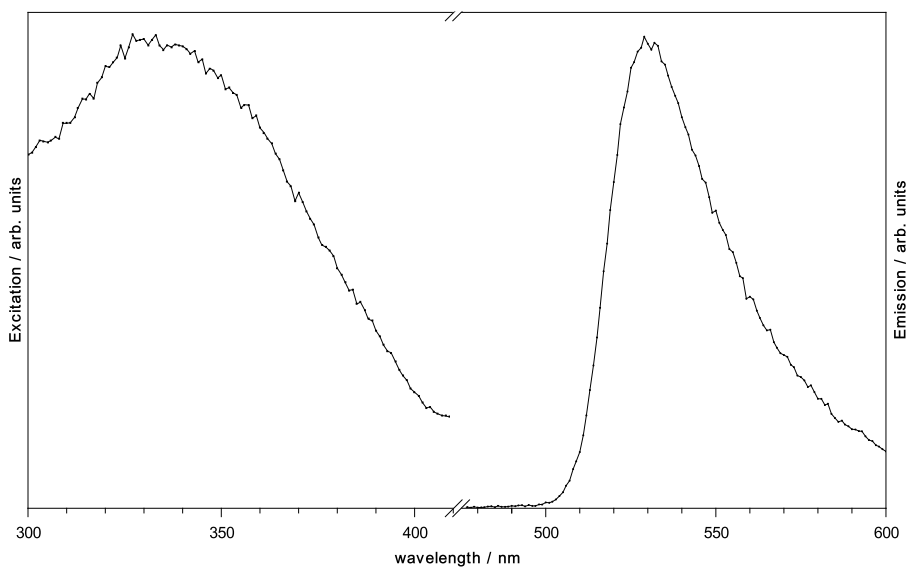

**Figure 22: Excitation spectrum of 4a in toluene with emission detected at  $\lambda_F$  (left); emission spectra obtained with excitation detected at  $\lambda_{Ex}$  (right).**



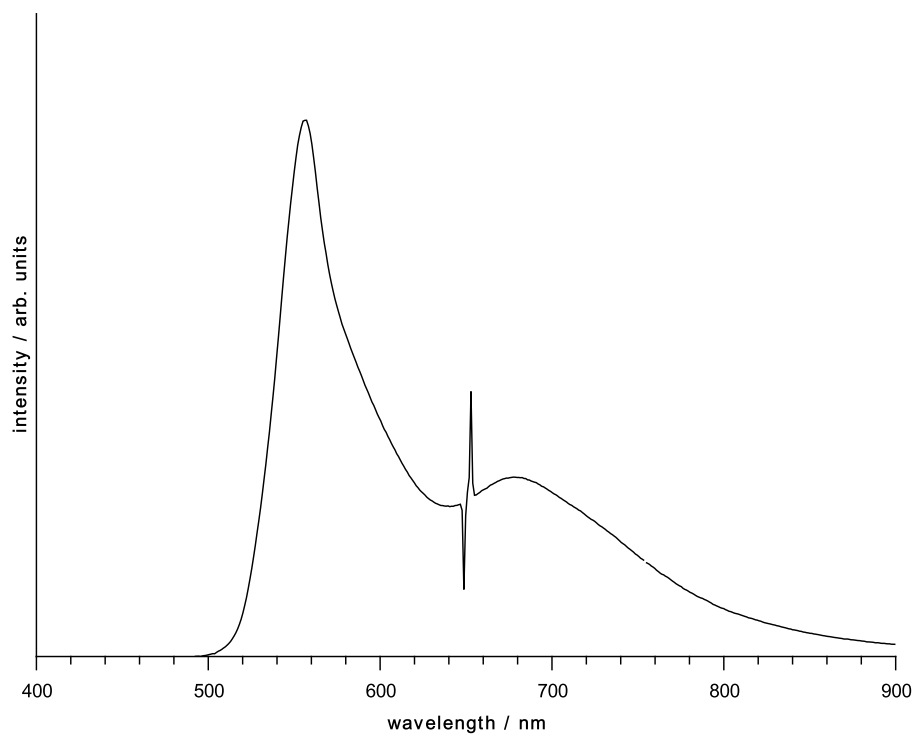

**Figure 23: Solid state PL spectrum of compound 4a. Excitation with 325 nm He-Cd continuous wave laser (the signal at 650 nm is the second diffraction order of the laser).**

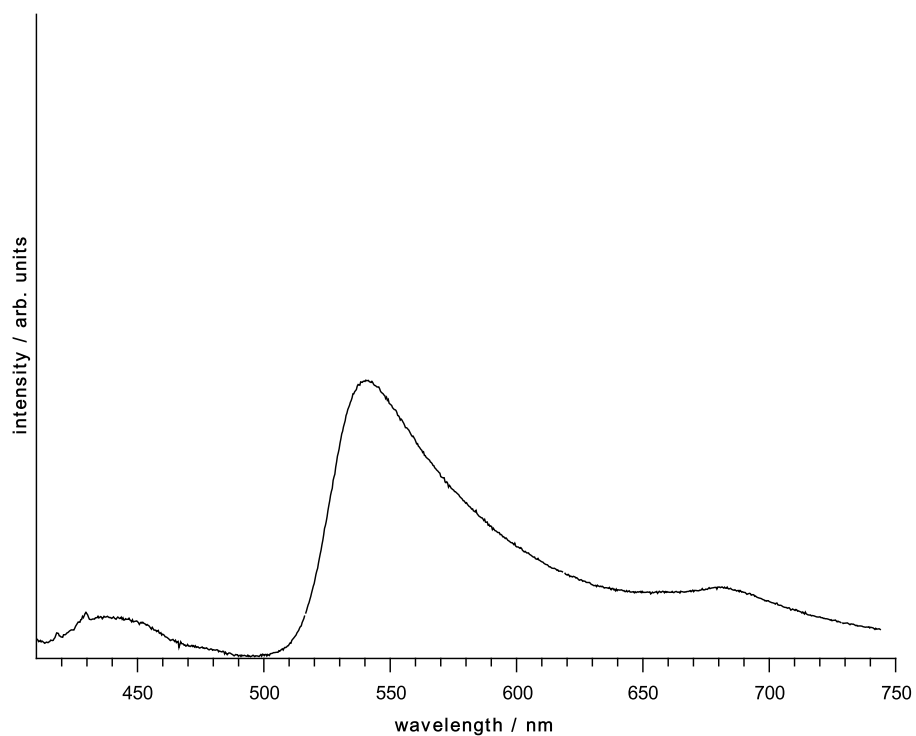

**Figure 24: Solution-state PL spectrum of compound 4a in toluene. Excitation with 405 nm continuous wave diode laser.**

1.4 (<sup>Mes</sup>DPM)AlEt<sub>2</sub> (**2b**):

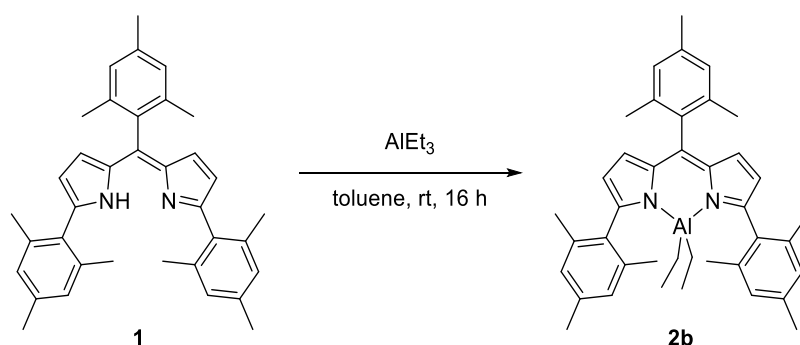

<sup>1</sup>H-NMR (300.19 MHz, C<sub>6</sub>D<sub>6</sub>)  $\delta$  = 6.81 (s, 2 H, -CH(Mes)), 6.78 (s, 4 H, -CH(Mes)), 6.72 (d, <sup>3</sup>J<sub>AB</sub> = 3.8 Hz, 2 H, -CH(py)), 6.07 (d, <sup>3</sup>J<sub>AB</sub> = 3.8 Hz, 2 H, -CH(py)), 2.23 (m, 21 H, -Me), 2.07 (s, 6 H, -Me), 0.81 (t, <sup>3</sup>J<sub>AB</sub> = 8.0 Hz, 6 H, -AlMe), 0.05 (q, <sup>3</sup>J<sub>AB</sub> = 8.1 Hz, 4 H, -AlCH<sub>2</sub>) ppm.

<sup>13</sup>C{<sup>1</sup>H}-NMR (75.48 MHz, C<sub>6</sub>D<sub>6</sub>)  $\delta$  = 162.29 (s, 2 C, C<sub>quart</sub> (pyr)), 146.52 (s, 1 C, C<sub>quart</sub>), 139.66 (s, 2 C, C<sub>quart</sub> (Mes)), 138.68 (s, 2 C, C<sub>quart</sub> (Mes)), 137.86 (s, 1 C, C<sub>quart</sub> (Mes)), 137.54 (s, 4 C, C<sub>quart</sub> (Mes)), 136.94 (s, 2 C, C<sub>quart</sub> (Mes)), 134.84 (s, 1 C, C<sub>quart</sub> (Mes)), 132.63 (s, 4 C, -CH (Mes)), 132.04 (s, 2 C, C<sub>quart</sub> (pyr)), 128.46 (s, 2 C, -CH (Mes)), 128.26 (s, 2 C, -CH (Im)), 120.47 (s, 2 C, -CH (Im)), 21.20 (s, 1 C, -Me), 21.16 (s, 2 C, -Me), 20.65 (s, 4 C, -Me), 20.04 (s, 2 C, -M), 9.14 (s, 2 C, -AlCH<sub>2</sub>CH<sub>3</sub>), 0.77 (s, 2 C, -AlCH<sub>2</sub>) ppm.

IR (cm<sup>-1</sup>)  $\nu$  = 2920.20 (w), 2859.56 (m), 1609.42 (w), 1546.52 (s), 1459.97 (m), 1370.77 (m), 330.35 (m), 1247.48 (s), 1212.14 (m), 1077.42 (m), 1051.17 (s), 1010.26 (s), 917.52 (m), 889.91 (w), 865.89 (m), 841.13 (s), 793.36 (m), 737.47 (m), 725.27 (m), 642.43 (m), 621.31 (m), 571.53 (m), 429.58 (w), 410.68 (w).

MS (HR-Cl<sup>+</sup>) (m/z (%)) calculated for [C<sub>40</sub>H<sub>48</sub>N<sub>2</sub>Al<sub>1</sub>]<sup>+</sup>: 583.36329; found: 583.36552 (20.55). calculated for [C<sub>38</sub>H<sub>42</sub>N<sub>2</sub>Al<sub>1</sub>]<sup>+</sup>: 553.31634; found: 553.31903 (100.0).

CHNS: calculated: C = 82.43%, H = 8.13%, N = 4.81%; found: C = 82.58%, H = 7.757%, N = 4.89%.

UV/Vis (BaSO<sub>4</sub>):  $\lambda_{max,ss}$  = 513 nm.

UV/Vis (toluene):  $\lambda_{max}$  = 505 nm (FWHM = 21 nm),  $\epsilon_{max}$  (505 nm) = 1.30 · 10<sup>5</sup> L mol<sup>-1</sup> cm<sup>-1</sup>.

SS-PL ( $\lambda_{EX}$  = 325 nm):  $\lambda_{F,SS}$  = 564 nm;  $\varphi_{F,SS}$  < 1 %.

PL (toluene,  $\lambda_{EX}$  = 405 nm):  $\lambda_F$  = 551 nm;  $\varphi_F$  < 1 %.

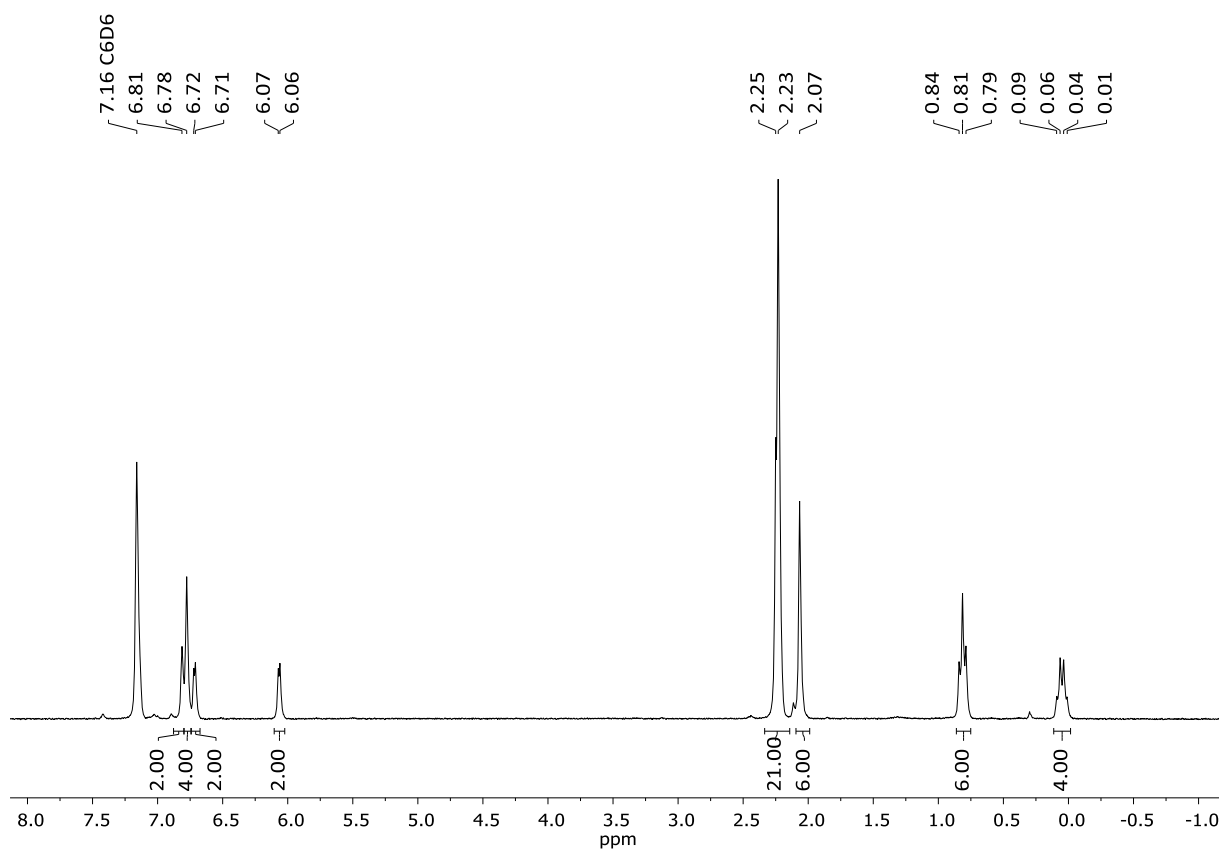

Figure 25:  $^1\text{H}$  NMR spectrum of compound 2b in  $\text{C}_6\text{D}_6$  at 300 K.

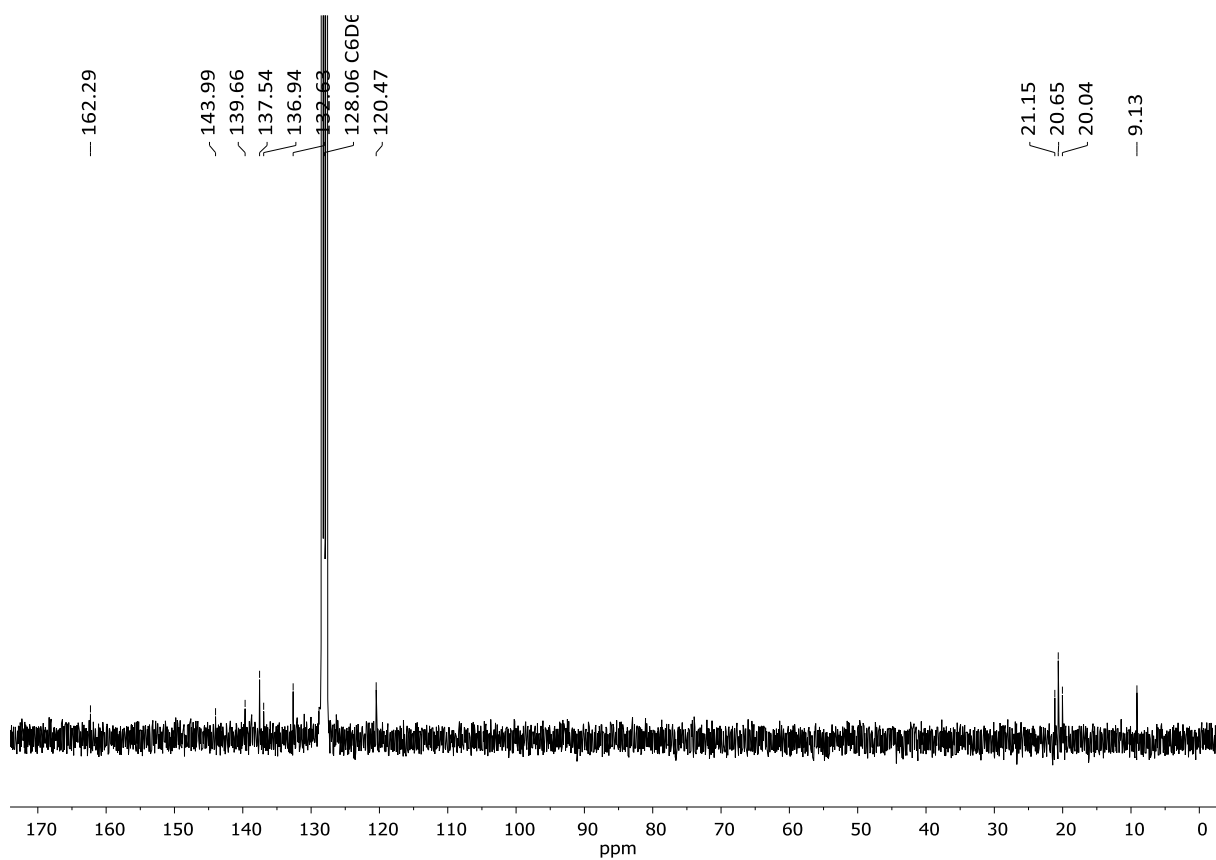

Figure 26:  $^{13}\text{C}$  NMR spectrum of compound 2b in  $\text{C}_6\text{D}_6$  at 300 K.

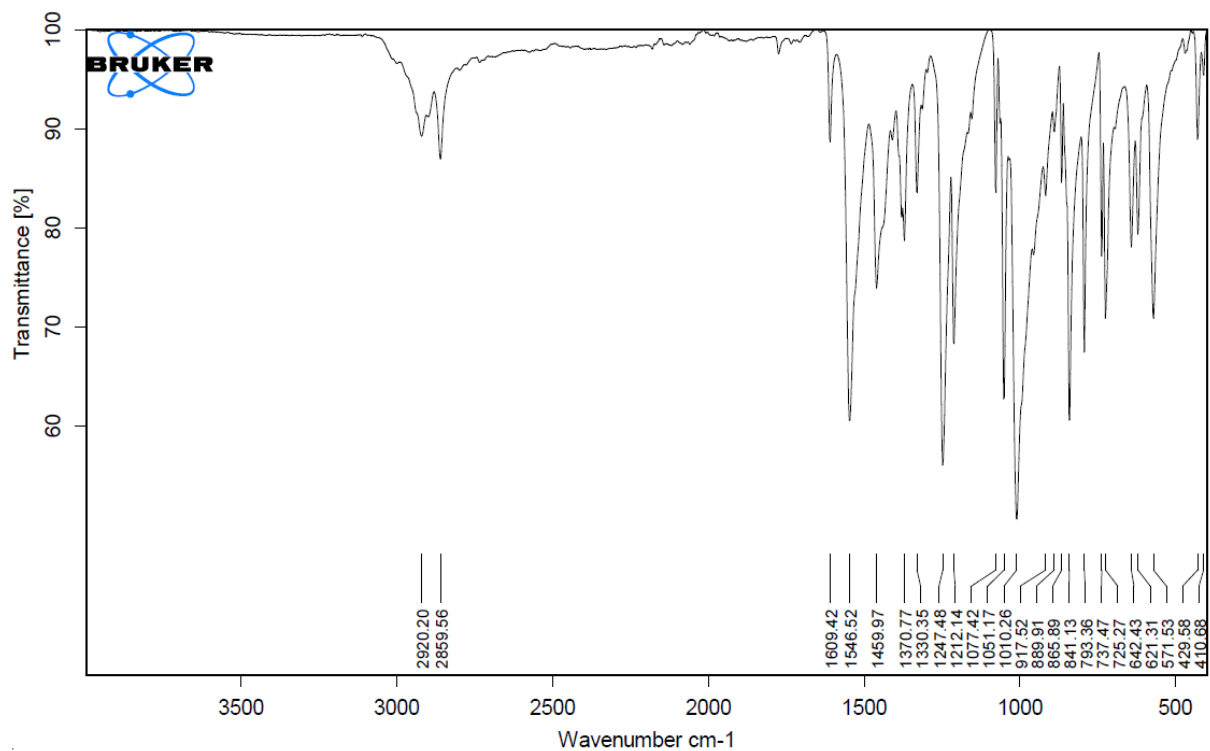

Figure 27: IR spectrum of compound 2b.

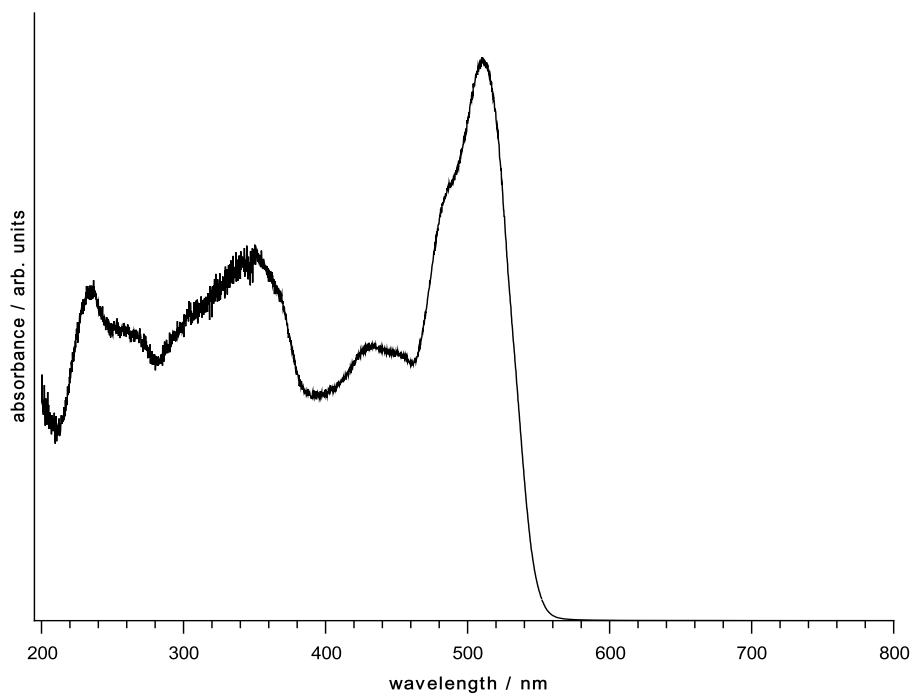

Figure 28: Solid state UV/VIS spectrum of compound 2b.

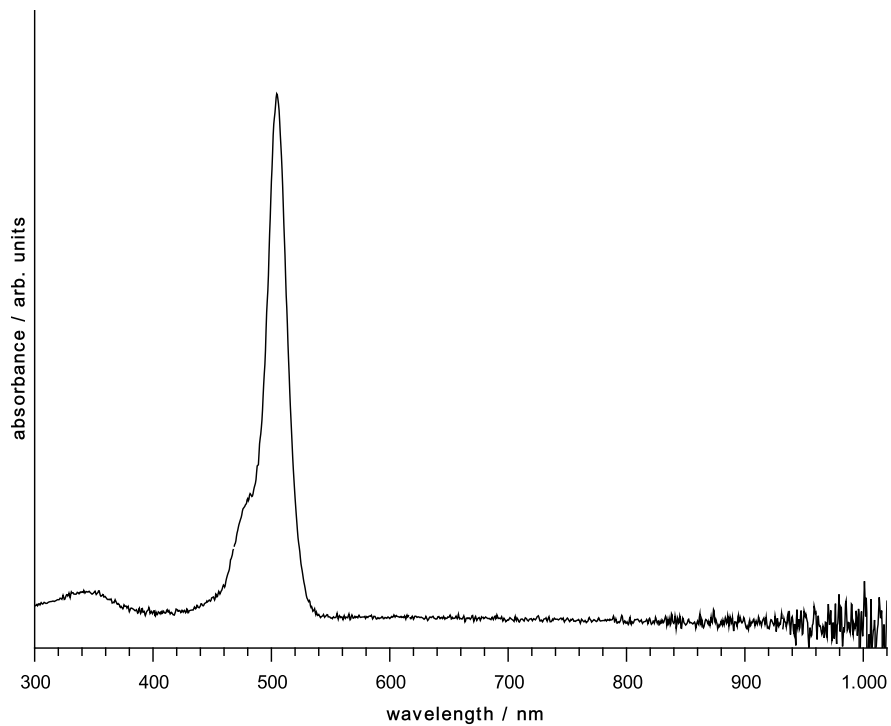

**Figure 29: Solution-state UV/VIS spectrum of compound 2b (2  $\mu$ M in toluene).**

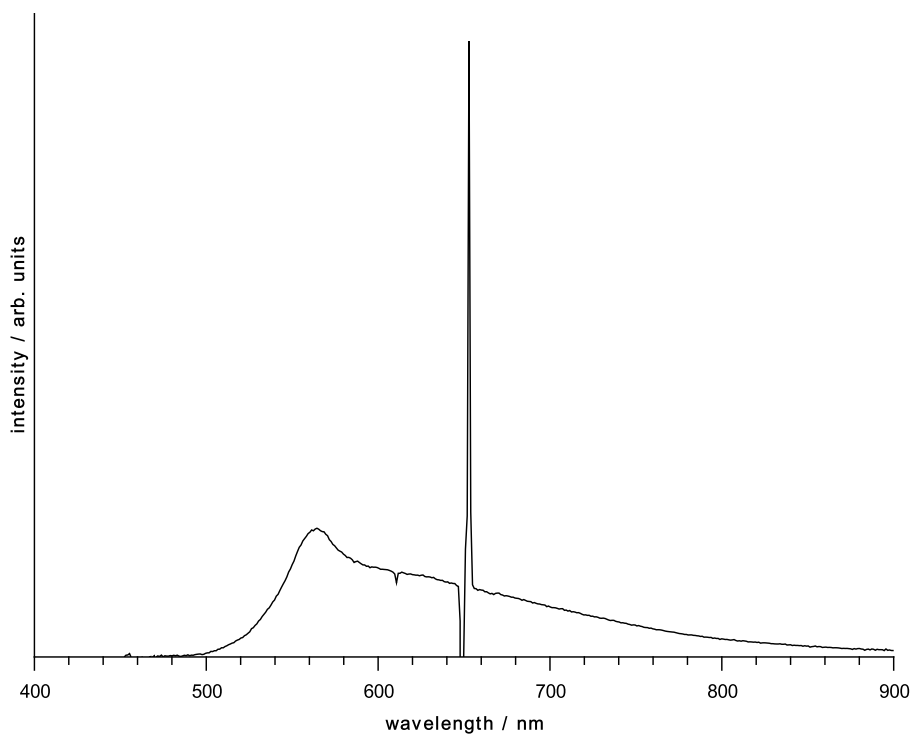

**Figure 30: Solid state PL spectrum of compound 2b. Excitation with 325 nm He-Cd continuous wave laser (the signal at 650 nm is the second diffraction order of the laser).**

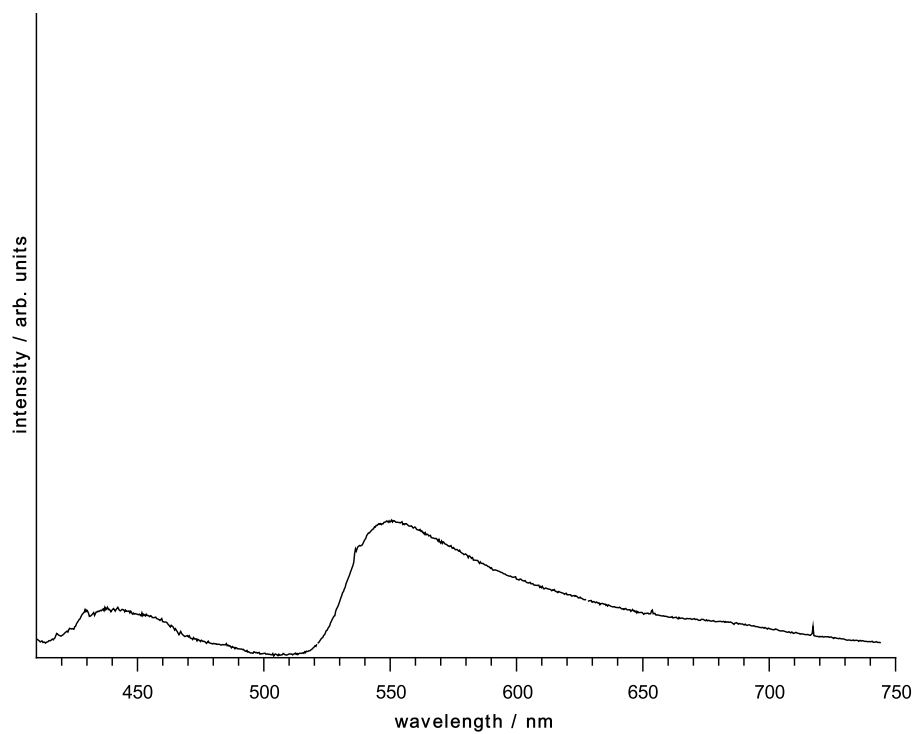

**Figure 31:** Solution-state PL spectrum of compound 2b in toluene. Excitation with 405 nm continuous wave diode laser.

1.5 (<sup>Mes</sup>DPM)GaEt<sub>2</sub> (**3b**):

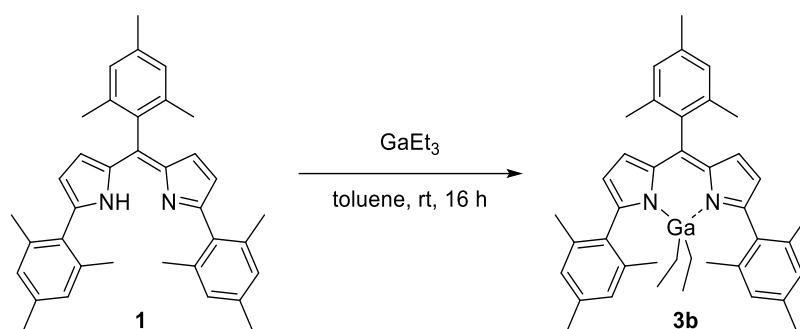

**<sup>1</sup>H-NMR** (300.19 MHz, C<sub>6</sub>D<sub>6</sub>)  $\delta$  = 6.83 (s, 2 H, -CH(Mes)), 6.77 (s, 4 H, -CH(Mes)), 6.77 (d, <sup>3</sup>J<sub>AB</sub> = 4.0 Hz, 2 H, -CH(py)), 6.12 (d, <sup>3</sup>J<sub>AB</sub> = 4.1 Hz, 2 H, -CH(py)), 2.28 (s, 6 H, -Me), 2.23 (s, 3 H, -Me), 2.21 (s, 12 H, -Me), 2.07 (s, 6 H, -Me), 0.83 (t, <sup>3</sup>J<sub>AB</sub> = 7.9 Hz, 6 H, -GaMe), 0.44 (q, <sup>3</sup>J<sub>AB</sub> = 8.0 Hz, 4 H, -GaCH<sub>2</sub>) ppm.

**<sup>13</sup>C{<sup>1</sup>H}-NMR** (75.48 MHz, C<sub>6</sub>D<sub>6</sub>)  $\delta$  = 161.12 (s, 2 C, C<sub>quart</sub> (pyr)), 146.04 (s, 1 C, C<sub>quart</sub>), 139.01 (s, 2 C, C<sub>quart</sub> (Mes)), 138.45 (s, 2 C, C<sub>quart</sub> (Mes)), 137.64 (s, 1 C, C<sub>quart</sub> (Mes)), 137.53 (s, 4 C, C<sub>quart</sub> (Mes)), 136.97 (s, 2 C, C<sub>quart</sub> (Mes)), 135.49 (s, 1 C, C<sub>quart</sub> (Mes)), 132.51 (s, 2 C, C<sub>quart</sub> (pyr)), 131.92 (s, 4 C, -CH (Mes)), 128.40 (s, 2 C, -CH (Mes)), 128.22 (s, 2 C, -CH (Im)), 119.63 (s, 2 C, -CH (Im)), 21.22 (s, 1 C, -Me), 21.15 (s, 2 C, -Me), 20.61 (s, 4 C, -Me), 20.10 (s, 2 C, -Me), 9.94 (s, 2 C, -GaCH<sub>2</sub>CH<sub>3</sub>), 4.18 (s, 2 C, -GaCH<sub>2</sub>) ppm.

**IR** (cm<sup>-1</sup>)  $\nu$  = 2999.17 (w), 2920.33 (m), 2861.84 (m), 2815.19 (w), 1609.48 (m), 1545.87 (s), 1461.50 (m), 1366.97 (m), 1334.91 (m), 1311.03 (w), 1251.58 (s), 1217.50 (m), 1075.96 (w), 1050.15 (m), 1004.35 (s), 916.25 (m), 886.64 (w), 865.25 (m), 850.19 (m), 838.88 (s), 789.18 (m), 734.68 (m), 724.86 (m), 650.87 (w), 620.37 (w), 582.01 (w), 571.22 (w), 558.01 (m), 522.86 (m), 467.45 (w), 411.55 (m).

**MS (HR-Cl<sup>+</sup>)** (m/z (%)) calculated for [C<sub>40</sub>H<sub>48</sub>N<sub>2</sub>Ga<sub>1</sub>]<sup>+</sup>: 625.30733; found: 625.30431(2.80); calculated for [C<sub>38</sub>H<sub>42</sub>N<sub>2</sub>Ga<sub>1</sub>]<sup>+</sup>: 595.26038; found: 595.25720 (8.57).

**CHNS**: calculated: C = 76.80%, H = 7.57%, N = 4.48%; found: C = 77.08%, H = 7.501%, N = 4.47%.

**UV/Vis** (BaSO<sub>4</sub>):  $\lambda_{max,ss}$  = 505 nm (FWHM = 86 nm).

**UV/Vis** (toluene):  $\lambda_{max}$  = 502 nm (FWHM = 22 nm),  $\epsilon_{max}$  (502 nm) = 1.10 · 10<sup>5</sup> L mol<sup>-1</sup> cm<sup>-1</sup>.

**Excitation/Emission** (toluene):  $\lambda_{Ex}$  = 344 nm;  $\lambda_{Em}$  = 536 nm.

**SS-PL** ( $\lambda_{Ex}$  = 325 nm):  $\lambda_{F,ss}$  = 563 nm;  $\varphi_{F,ss}$  < 1 %.

**PL** (toluene,  $\lambda_{Ex}$  = 405 nm):  $\lambda_F$  = 545 nm;  $\varphi_F$  = 2 %.

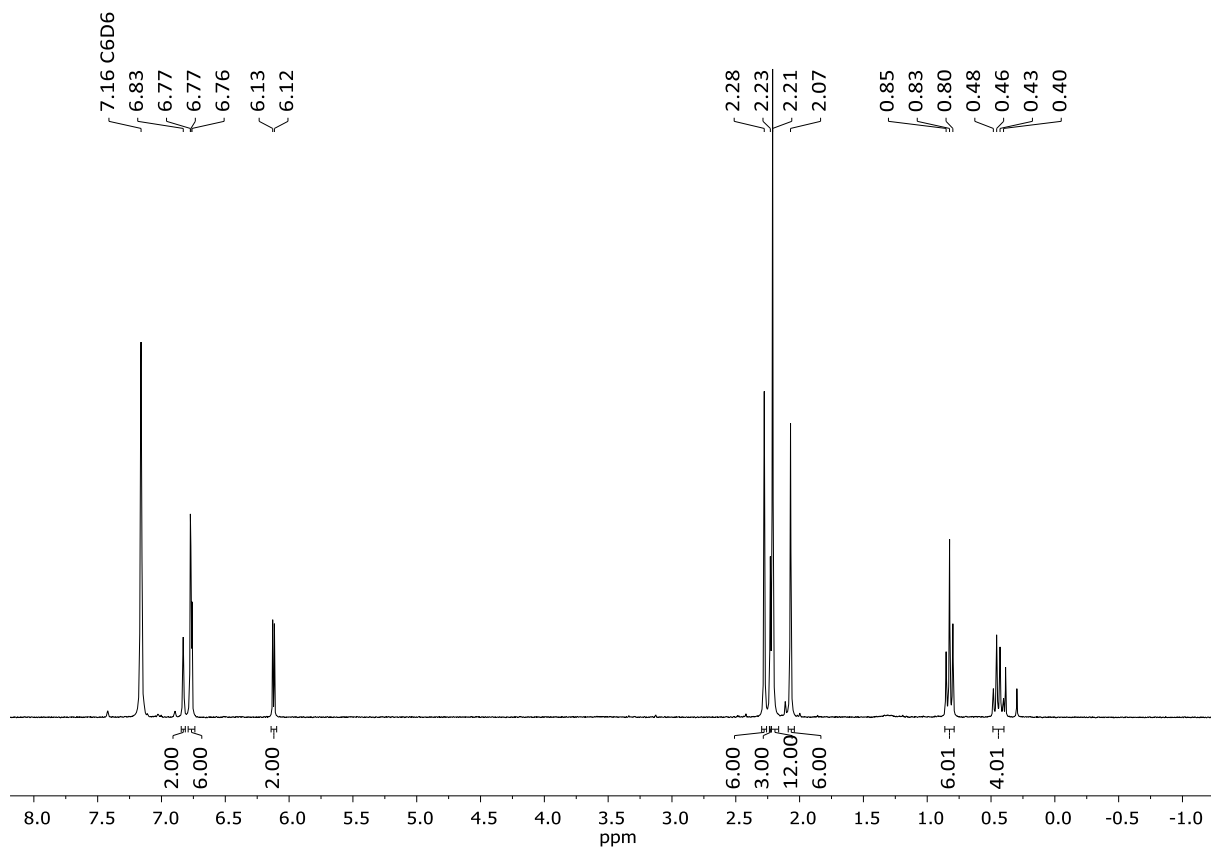

Figure 32:  $^1\text{H}$  NMR spectrum of compound **3b** in  $\text{C}_6\text{D}_6$  at 300 K.

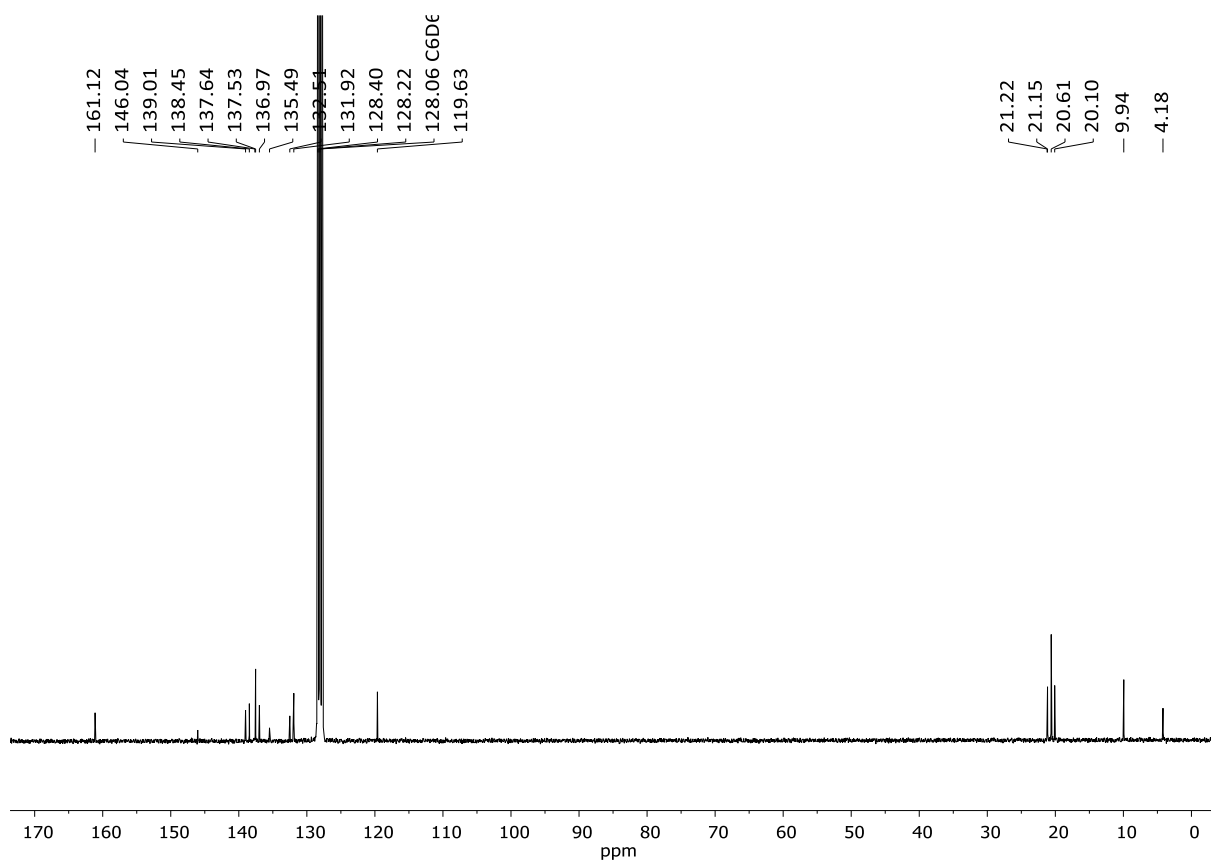

Figure 33:  $^{13}\text{C}$  NMR spectrum of compound **3b** in  $\text{C}_6\text{D}_6$  at 300 K.



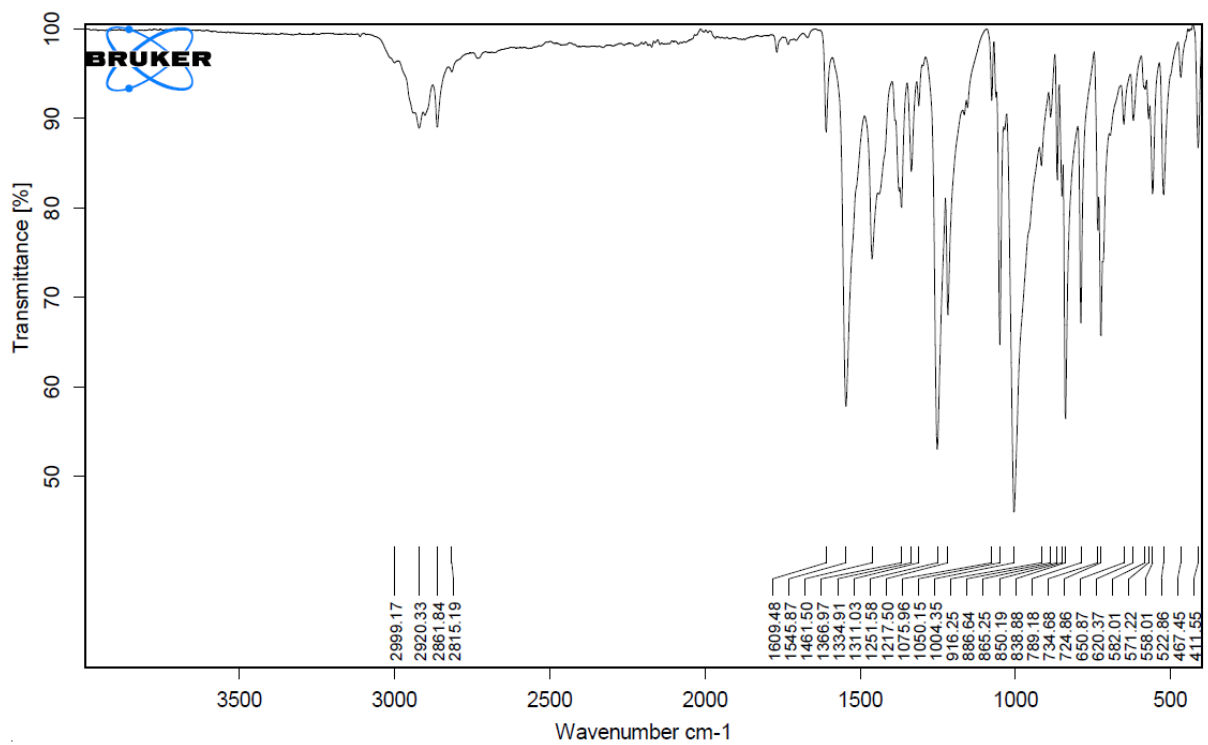

Figure 34: IR spectrum of compound 3b.

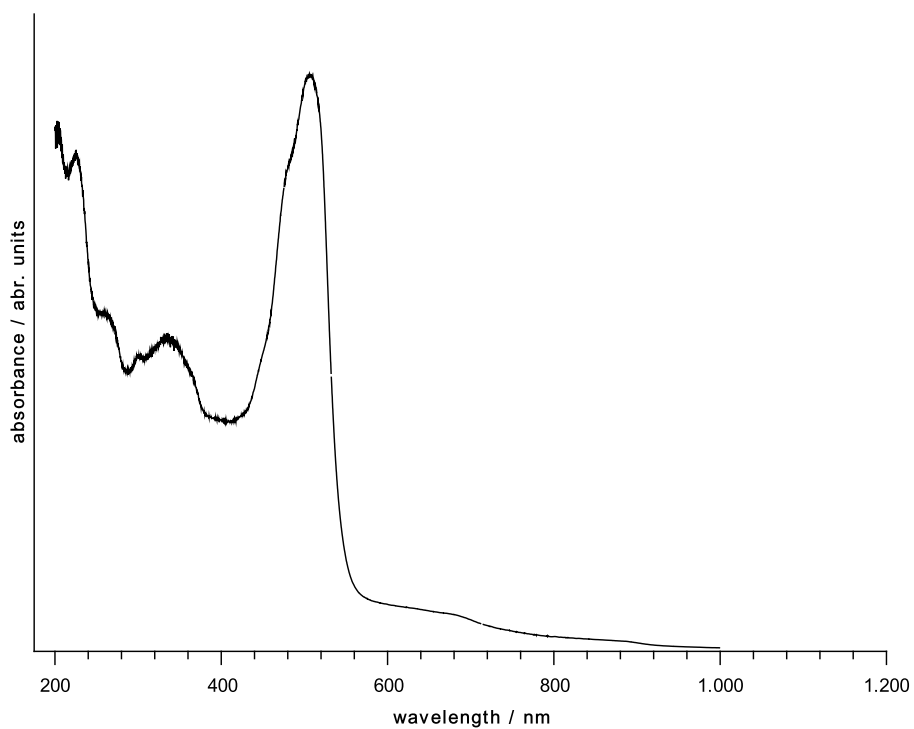

Figure 35: Solid state UV/VIS spectrum of compound 3b.

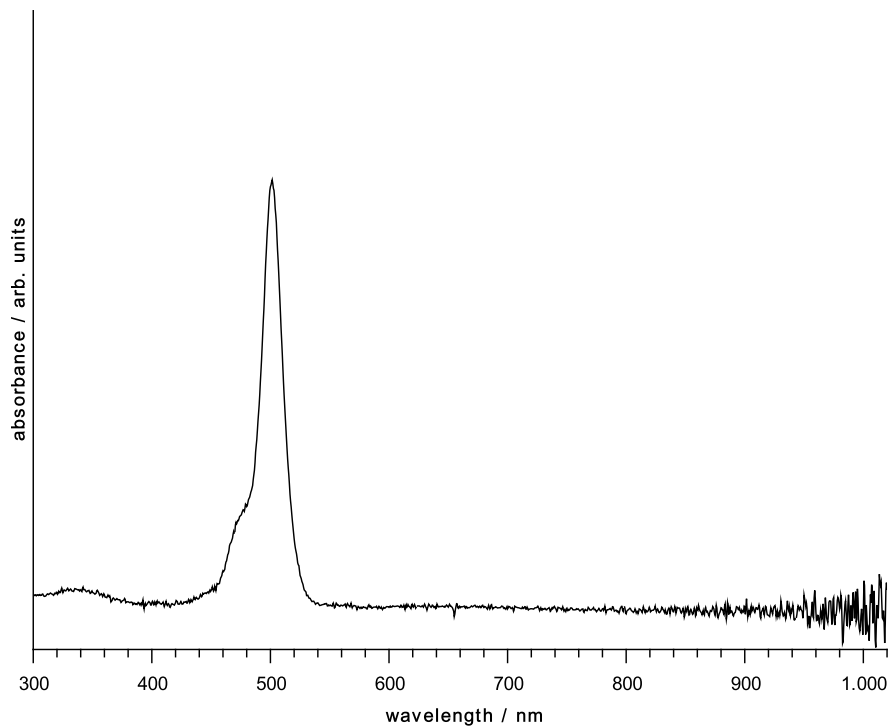

**Figure 36: Solution-state UV/VIS spectrum of compound 3b (2  $\mu\text{M}$  in toluene).**

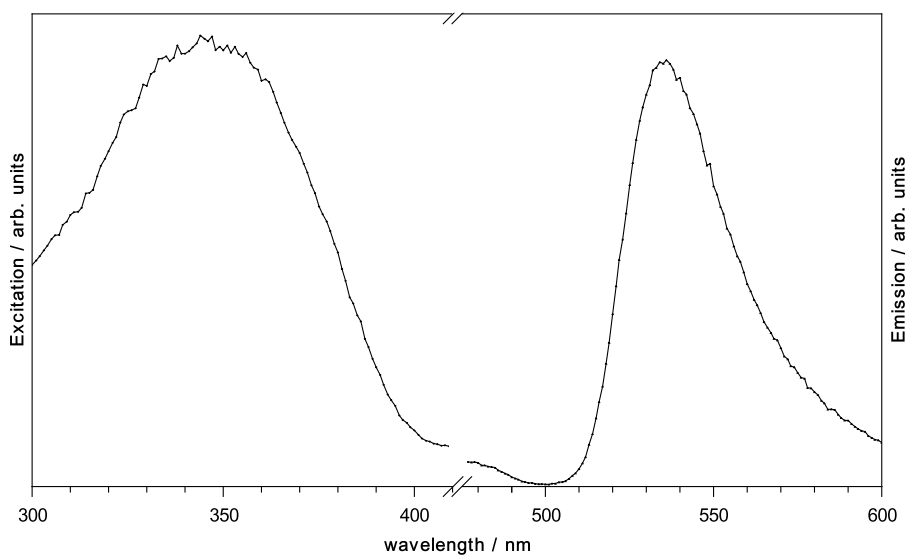

**Figure 37: Excitation spectrum of 3b in toluene with emission detected at  $\lambda_F$  (left); emission spectra obtained with excitation detected at  $\lambda_{Ex}$  (right).**

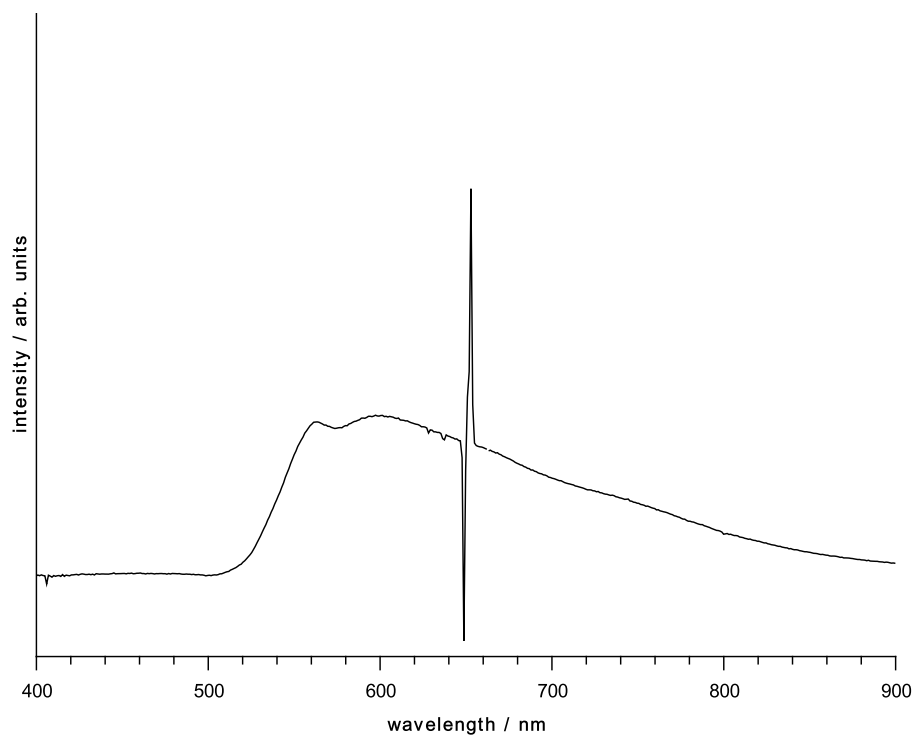

**Figure 38: Solid state PL spectrum of compound 3b. Excitation with 325 nm He-Cd continuous wave laser (the signal at 650 nm is the second diffraction order of the laser).**

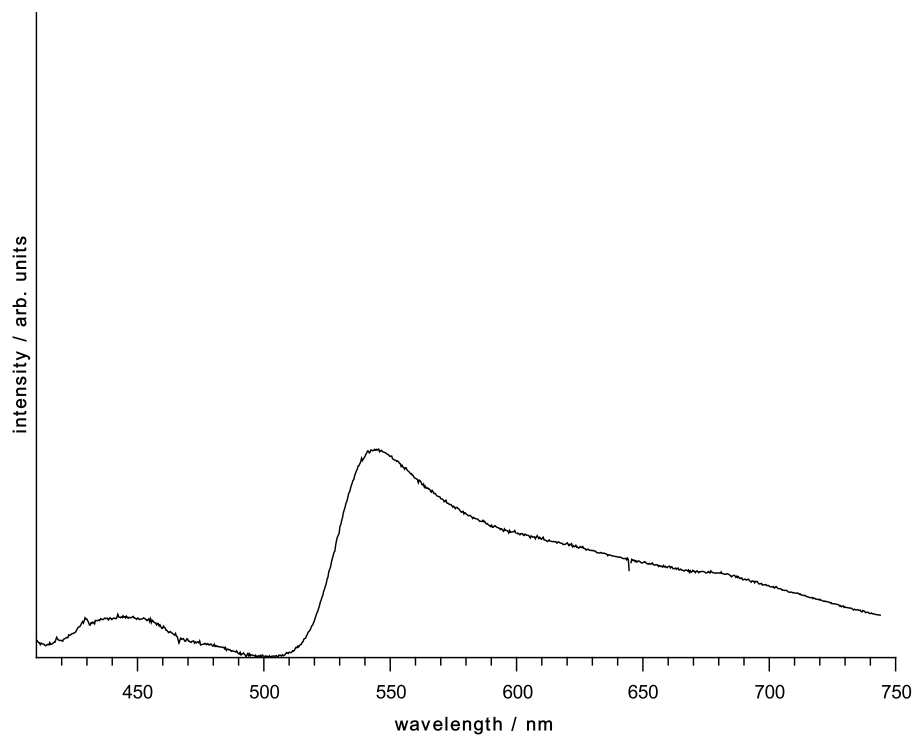

**Figure 39: Solution-state PL spectrum of compound 3b in toluene. Excitation with 405 nm continuous wave diode laser.**

1.6 (<sup>Mes</sup>DPM)InEt<sub>2</sub> (**4b**):

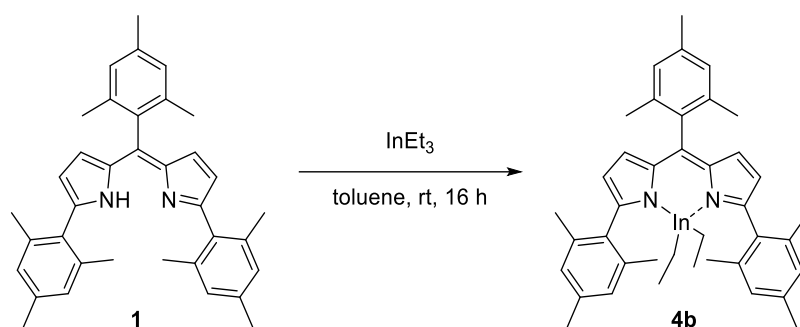

**<sup>1</sup>H-NMR** (300.19 MHz, C<sub>6</sub>D<sub>6</sub>)  $\delta$  = 6.81 (s, 2 H, -CH(Mes)), 6.78 (s, 4 H, -CH(Mes)), 6.71 (d, <sup>3</sup>J<sub>AB</sub> = 4.0 Hz, 2 H, -CH(py)), 6.06 (d, <sup>3</sup>J<sub>AB</sub> = 4.0 Hz, 2 H, -CH(py)), 2.25 (s, 6 H, -Me), 2.23 (s, 12 H, -Me), 2.22 (s, 3 H, -Me), 2.06 (s, 6 H, -Me), 0.81 (t, <sup>3</sup>J<sub>AB</sub> = 8.0 Hz, 6 H, -InMe), 0.05 (q, <sup>3</sup>J<sub>AB</sub> = 8.0 Hz, 4 H, -InCH<sub>2</sub>) ppm.

**<sup>13</sup>C{<sup>1</sup>H}-NMR** (75.48 MHz, C<sub>6</sub>D<sub>6</sub>)  $\delta$  = 162.28 (s, 2 C, C<sub>quart</sub> (pyr)), 146.51 (s, 1 C, C<sub>quart</sub>), 139.62 (s, 2 C, C<sub>quart</sub> (Mes)), 138.68 (s, 2 C, C<sub>quart</sub> (Mes)), 137.84 (s, 1 C, C<sub>quart</sub> (Mes)), 137.53 (s, 4 C, C<sub>quart</sub> (Mes)), 136.91 (s, 2 C, C<sub>quart</sub> (Mes)), 134.80 (s, 1 C, C<sub>quart</sub> (Mes)), 132.62 (s, 2 C, C<sub>quart</sub> (pyr)), 132.00 (s, 4 C, -CH (Mes)), 128.45 (s, 2 C, -CH (Mes)), 128.35 (s, 2 C, -CH (Im)), 120.46 (s, 2 C, -CH (Im)), 21.20 (s, 1 C, -Me), 21.16 (s, 2 C, -Me), 20.66 (s, 4 C, -Me), 20.05 (s, 2 C, -Me), 9.16 (s, 2 C, -InCH<sub>2</sub>CH<sub>3</sub>), 0.74 (s, 2 C, -InCH<sub>2</sub>) ppm.

**IR** (cm<sup>-1</sup>)  $\nu$  = 2920.94 (w), 2859.93 (w), 1609.74 (w), 1547.15 (s), 1460.58 (m), 1409.57 (w), 1379.55 (m), 1371.25 (m), 1330.84 (w), 1248.10 (s), 1212.64 (m), 1153.76 (w), 1077.64 (m), 1051.55 (s), 1010.85 (s), 956.22 (m), 918.00 (w), 890.19 (w), 866.05 (w), 841.45 (s), 793.59 (m), 737.53 (m), 725.60 (m), 642.66 (m), 621.51 (m), 572.47 (m), 429.83 (w), 411.66 (w).

**MS (HR-Cl<sup>+</sup>)** (m/z (%)) calculated for [C<sub>40</sub>H<sub>48</sub>N<sub>2</sub>In<sub>1</sub>]<sup>+</sup>: 671.28563; found: 671.28396 (31.28); calculated for [C<sub>38</sub>H<sub>42</sub>N<sub>2</sub>In<sub>1</sub>]<sup>+</sup>: 641.23868; found: 641.23735 (100.0); calculated for [C<sub>36</sub>H<sub>39</sub>N<sub>2</sub>]<sup>+</sup>: 499.31132; found: 499.30974 (52.60).

**UV/Vis** (BaSO<sub>4</sub>):  $\lambda_{max,ss}$  = 512 nm (FWHM = 59 nm).

**UV/Vis** (toluene):  $\lambda_{max}$  = 505 nm (FWHM = 21 nm),  $\epsilon_{max}$  (505 nm) = 1.49·10<sup>5</sup> L mol<sup>-1</sup> cm<sup>-1</sup>.

**SS-PL** ( $\lambda_{Ex}$  = 325 nm):  $\lambda_{F,ss}$  = 567 nm;  $\varphi_{F,ss}$  < 1 %.

**PL** (toluene,  $\lambda_{Ex}$  = 405 nm):  $\lambda_F$  = 547 nm;  $\varphi_F$  < 1 %.

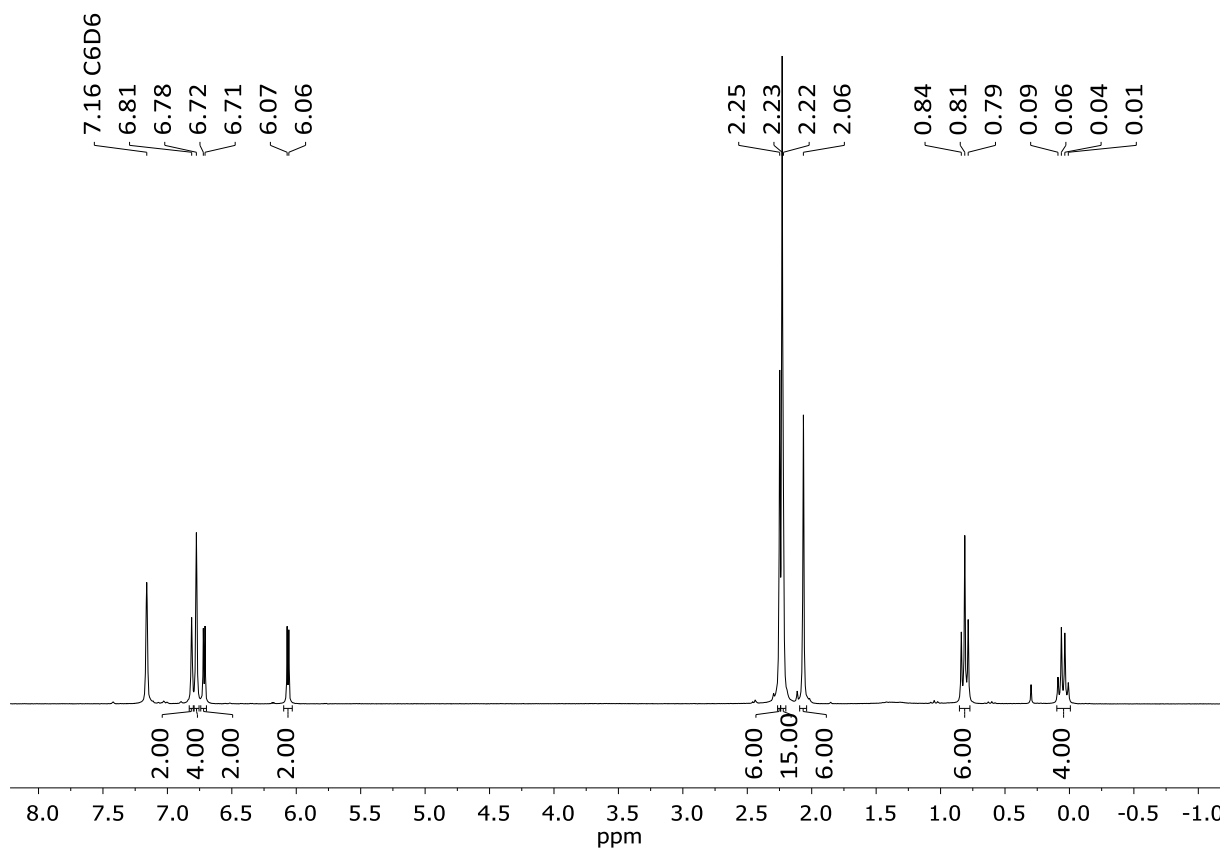

Figure 40:  $^1\text{H}$  NMR spectrum of compound **4b** in  $\text{C}_6\text{D}_6$  at 300 K.

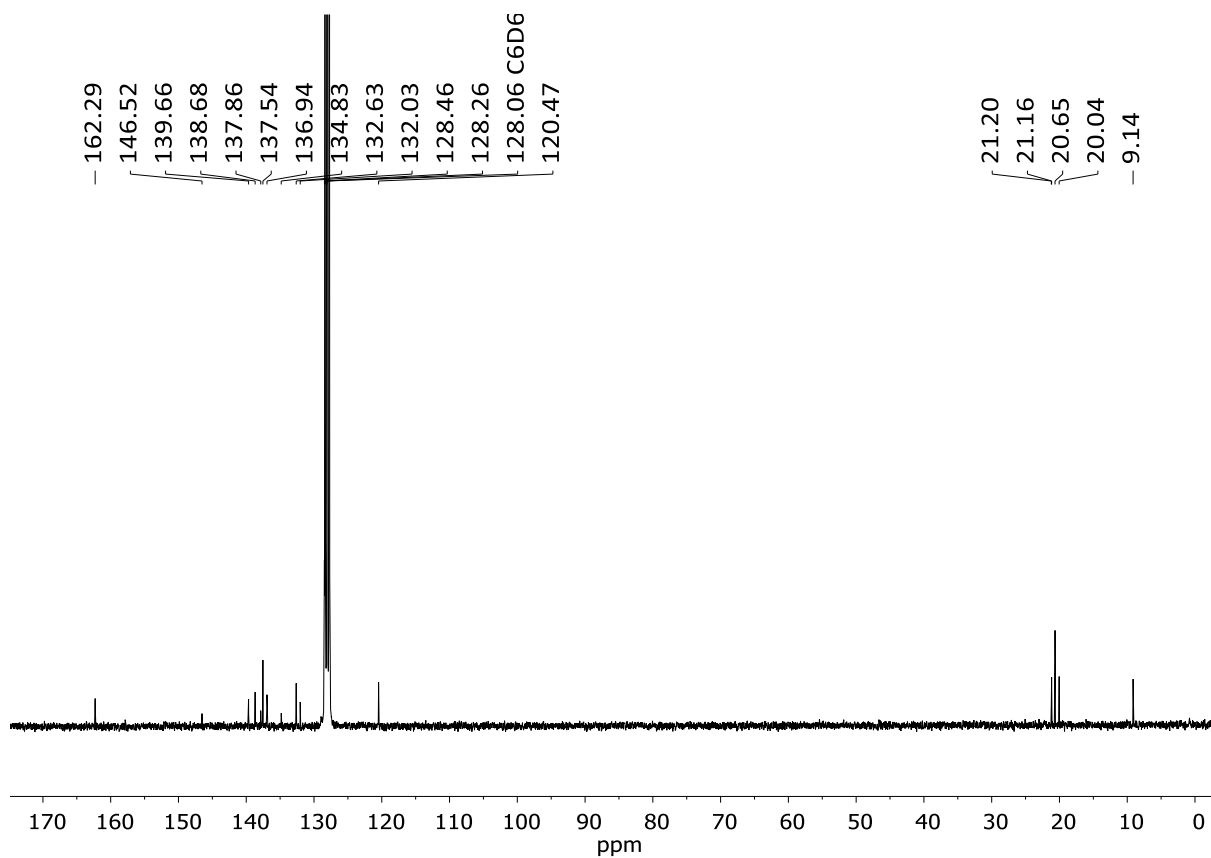

Figure 41:  $^{13}\text{C}$  NMR spectrum of compound **4b** in  $\text{C}_6\text{D}_6$  at 300 K.

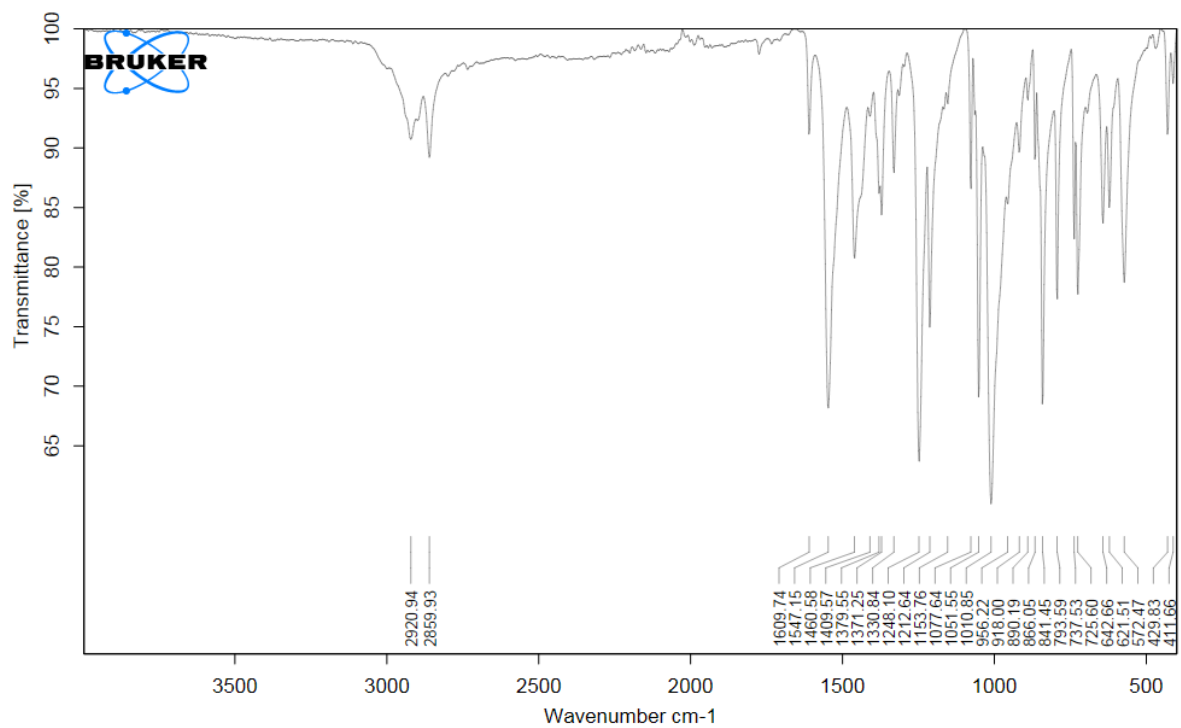

Figure 42: IR spectrum of compound 4b.

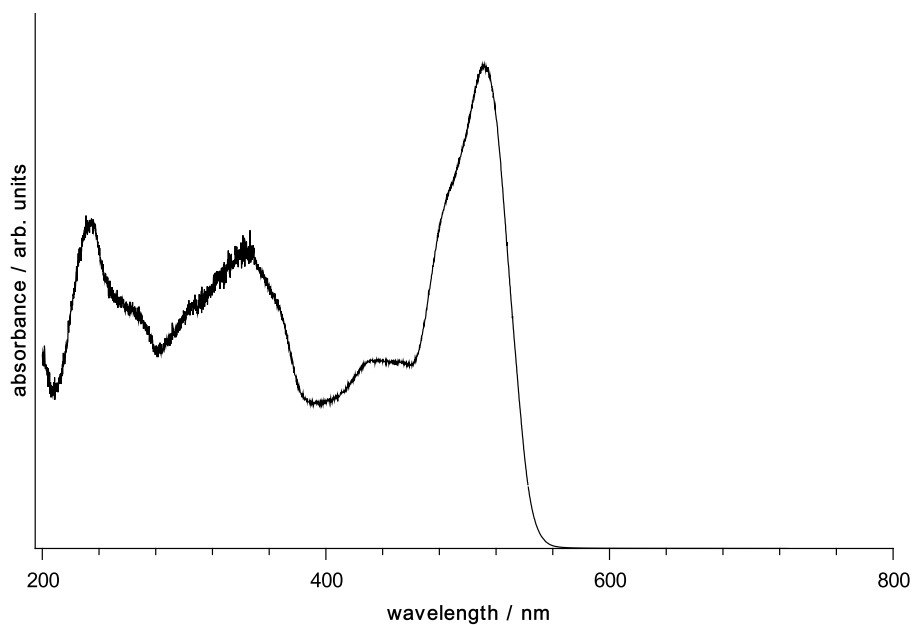

Figure 43: Solid state UV/VIS spectrum of compound 4b.

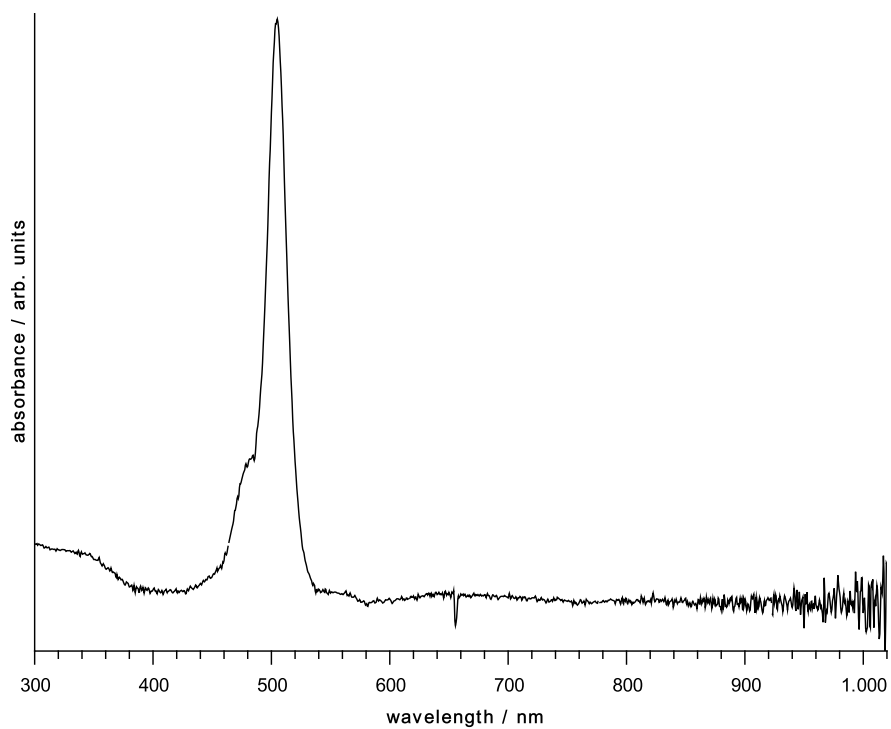

**Figure 44: Solution-state UV/VIS spectrum of compound 4b (2  $\mu$ M in toluene).**

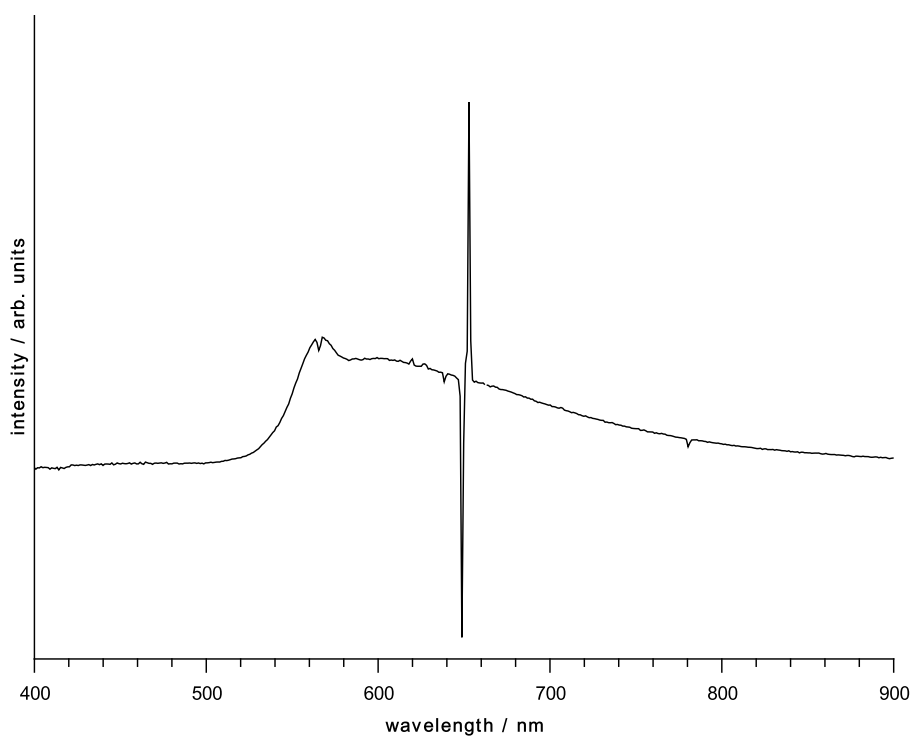

**Figure 45: Solid state PL spectrum of compound 4b. Excitation with 325 nm He-Cd continuous wave laser (the signal at 650 nm is the second diffraction order of the laser).**

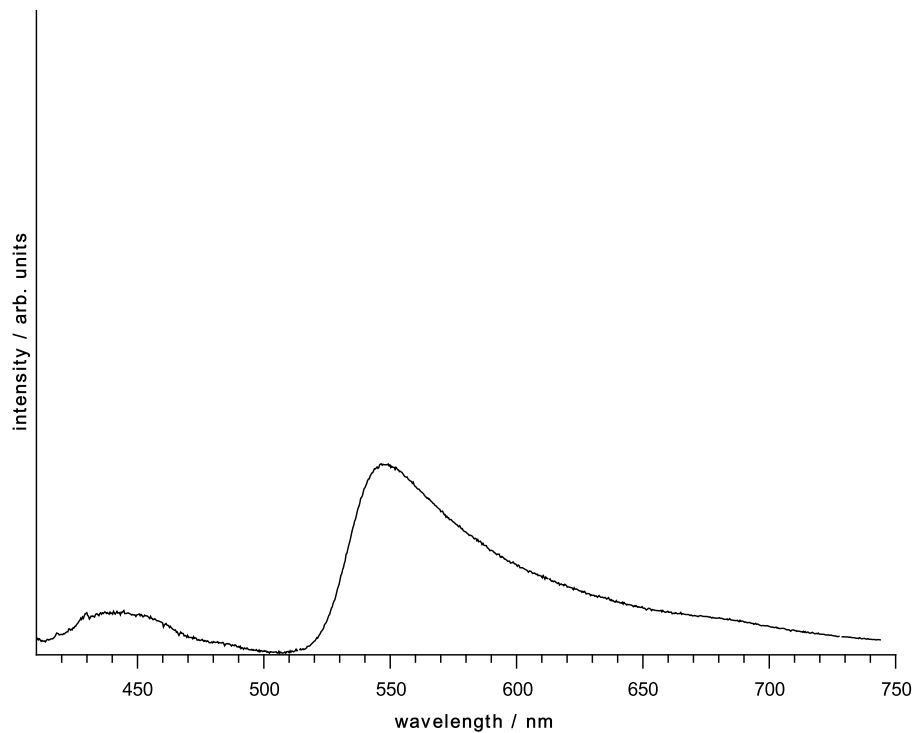

**Figure 46:** Solution-state PL spectrum of compound 4b in toluene. Excitation with 405 nm continuous wave diode laser.



## 2. UV/Vis and photoluminescence spectra in solution and solid-state:

### 2.1 Solid-state UV/Vis spectra:

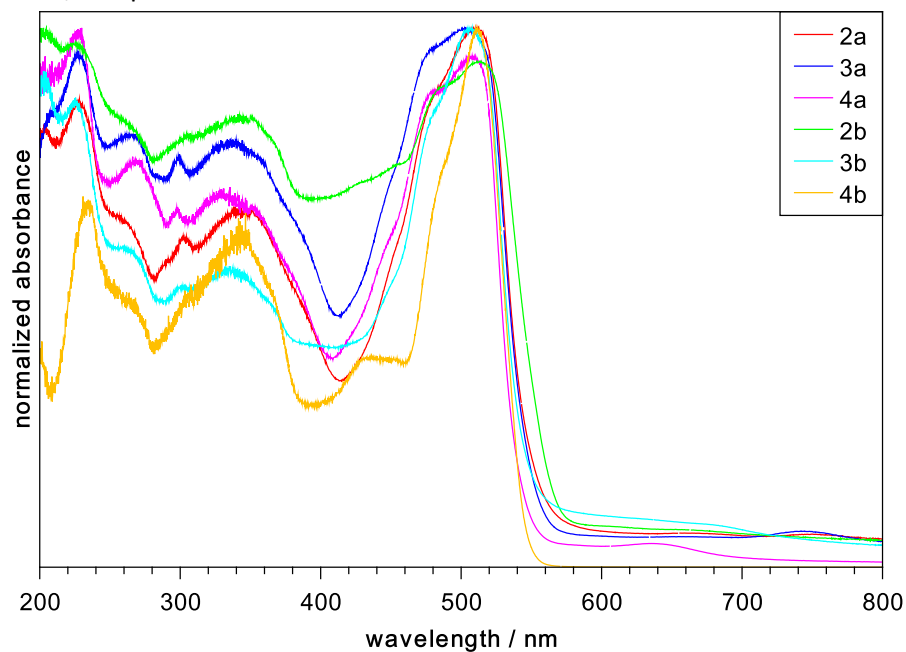

Figure 4. Normalized and stacked solid-state UV/Vis spectra of synthesized *Mes*DPM triel complexes (colour scheme: red = 2a; blue = 3a; violet = 4a; green = 2b; turquoise = 3b; yellow = 4b).

### 2.2 UV/Vis spectra in solution:

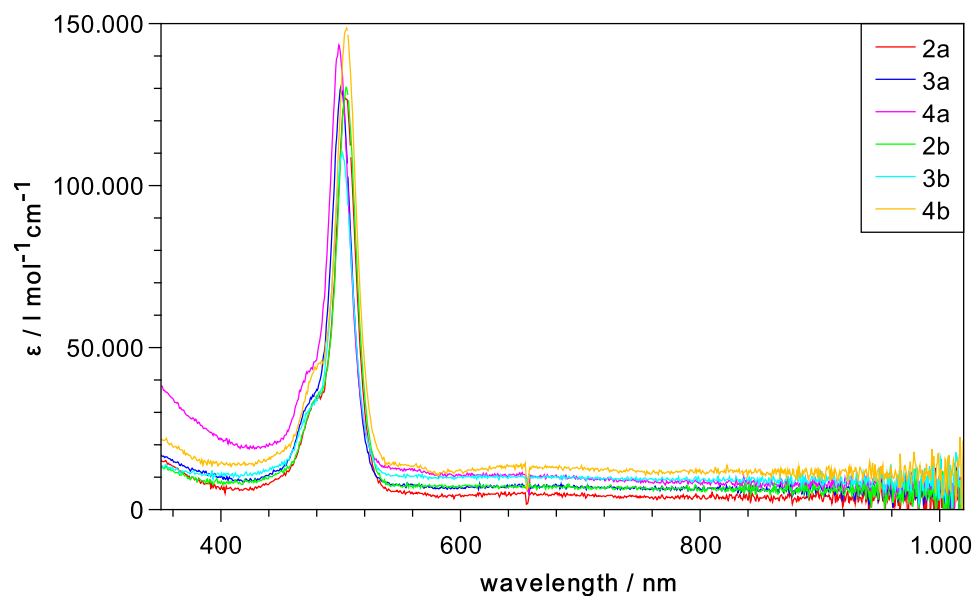

Figure 47: UV/Vis absorption spectra of synthesized *Mes*DPM triel complexes in toluene solution (colour scheme: red = 2a; blue = 3a; violet = 4a; green = 2b; turquoise = 3b; yellow = 4b).

### 2.3 Comparison of extinction and emission spectra in the vicinity of the HOMO LUMO transition:

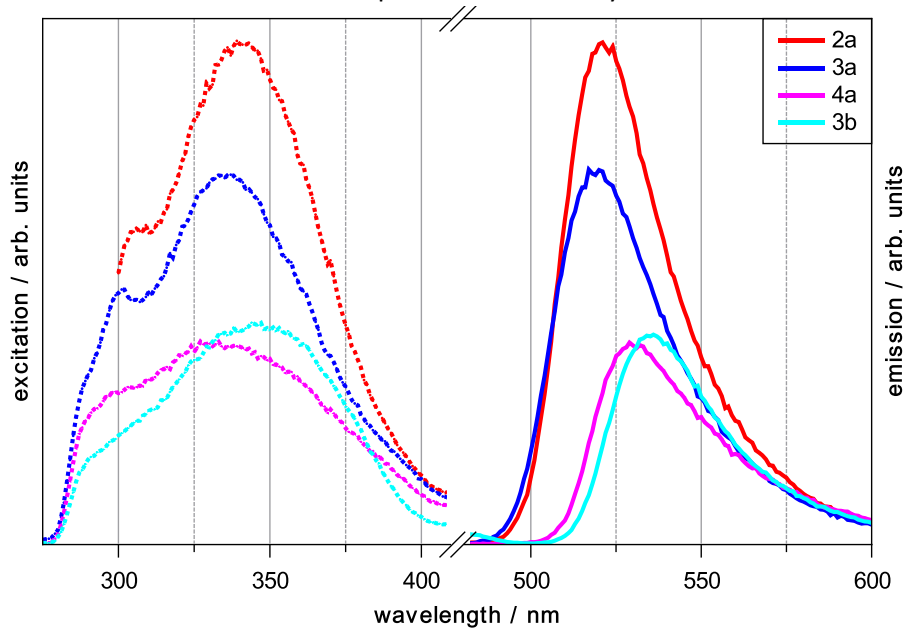

Figure 5. Extinction spectra obtained from samples of *Mes*DPM triel dialkyls (2a–4a & 3b) in toluene with emission detected at  $\lambda_F$  = dashed lines; emission spectra obtained with excitation detected at  $\lambda_{Ex}$  = solid lines.

### 2.4 Solid-state photoluminescence spectra:

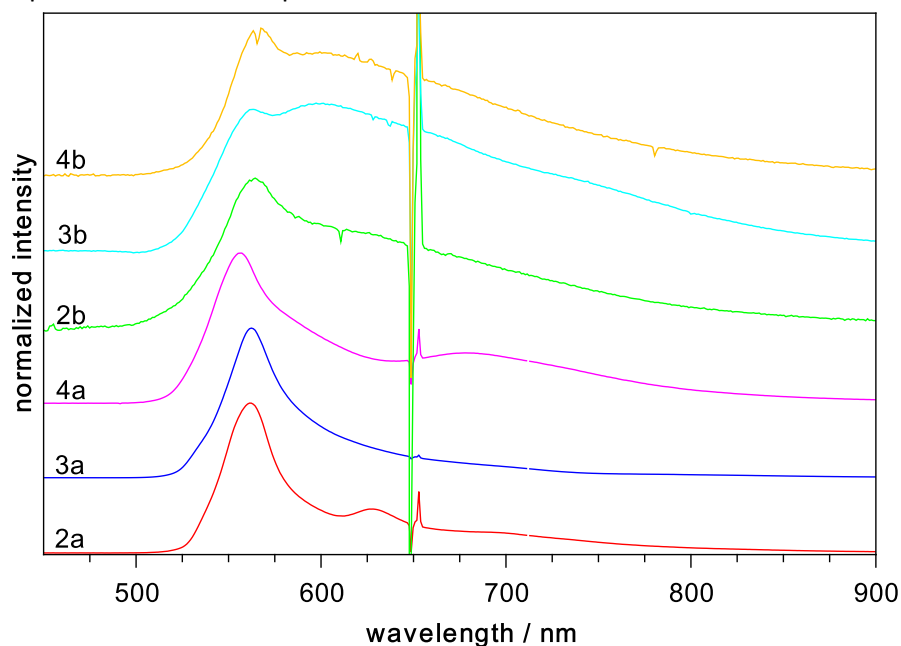

Figure 48: Normalized and vertically stacked solid-state photoluminescence spectra of synthesized *Mes*DPM triel complexes (colour scheme: red = 2a; blue = 3a; violet = 4a; green = 2b; turquoise = 3b; yellow = 4b). Excitation with 325 nm He-Cd continuous wave laser (the signal at 650 nm is the second diffraction order of the laser).

## 2.5 Photoluminescence spectra in toluene solution:

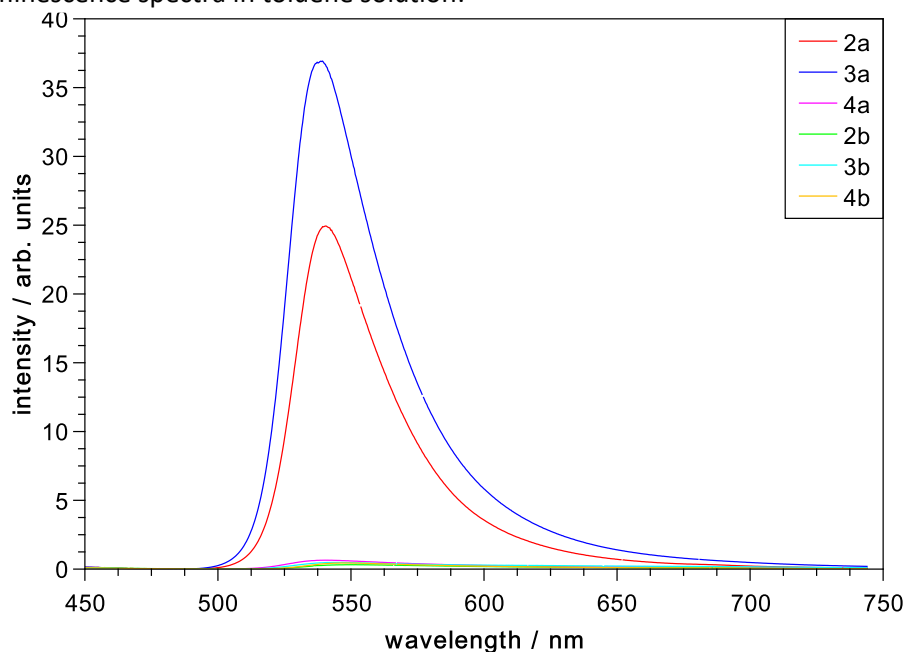

**Figure 6. Photoluminescence spectra of synthesized <sup>Mes</sup>DPM triel complexes in toluene (colour scheme: red = 2a; blue = 3a; violet = 4a; green = 2b; turquoise = 3b; yellow = 4b). Excitation with 405 nm continuous wave diode laser.**

## 2.6 Spectroscopic data:

**Table 1: Spectroscopic data of (<sup>Mes</sup>DPM)MX<sub>2</sub> (2–4a/b).**

| Compound  | $\lambda_{\max,ss}$ / nm | $\lambda_{\max}$ / nm | $\epsilon_{\max}(\lambda_{\max})$ / L mol <sup>-1</sup> cm <sup>-1</sup> | $\lambda_{Ex}$ / nm | $\lambda_{Em}$ / nm | $\lambda_F$ / nm | $\varphi_F$ / % | $\lambda_{F,ss}$ / nm | $\varphi_{F,ss}$ / % |
|-----------|--------------------------|-----------------------|--------------------------------------------------------------------------|---------------------|---------------------|------------------|-----------------|-----------------------|----------------------|
| <b>2a</b> | 509                      | 504                   | 1.27·10 <sup>5</sup>                                                     | 339                 | 521                 | 540              | 44              | 562                   | 34                   |
| <b>3a</b> | 502                      | 500                   | 1.30·10 <sup>5</sup>                                                     | 337                 | 517                 | 539              | 51              | 562                   | 33                   |
| <b>4a</b> | 509                      | 499                   | 1.43·10 <sup>5</sup>                                                     | 327                 | 529                 | 540              | 2               | 557                   | 3                    |
| <b>2b</b> | 513                      | 505                   | 1.30·10 <sup>5</sup>                                                     | -                   | -                   | 551              | < 1             | 564                   | < 1                  |
| <b>3b</b> | 505                      | 502                   | 1.10·10 <sup>5</sup>                                                     | 344                 | 536                 | 545              | 2               | 563                   | < 1                  |
| <b>4b</b> | 512                      | 505                   | 1.49·10 <sup>5</sup>                                                     | -                   | -                   | 547              | < 1             | 567                   | < 1                  |

$\lambda_{\max,ss}$  = absorption maximum (solid-state),  $\lambda_{\max}$  = absorption maximum (toluene solution),  $\epsilon_{\max}(\lambda_{\max})$  = molar absorption coefficient at  $\lambda_{\max}$ ,  $\lambda_{Ex}$  = excitation maximum (in toluene solution),  $\lambda_{Em}$  = emission maximum (in toluene solution),  $\lambda_F$  = fluorescence maximum (in toluene solution),  $\varphi_F$  = fluorescence quantum yield (in toluene solution),  $\lambda_{F,ss}$  = fluorescence maximum (solid-state),  $\varphi_{F,ss}$  = fluorescence quantum yield (solid-state).

### 3. Crystallographic data:

#### 3.1 (<sup>Mes</sup>DPM)H (1):

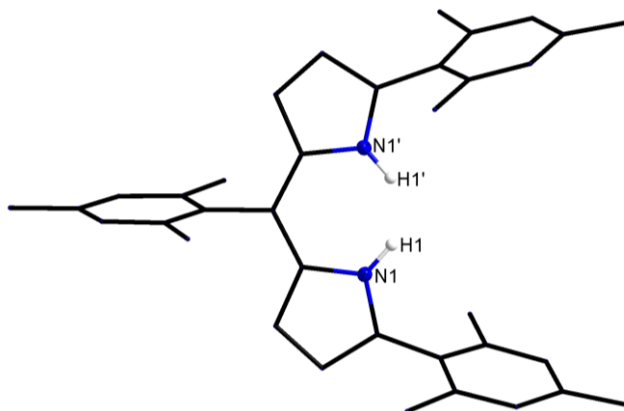

Figure 49: Solid-state molecular structure of (<sup>Mes</sup>DPM)H (1) with thermal ellipsoids set at the 50% probability level (colour scheme: C = black; N = blue). C atoms are depicted as wireframe. Carbon-bound H atoms are omitted for clarity (H1' is generated by symmetry; total occupancy of H1 and H1' = 1).

Table 2: Crystal data and structure refinement of (<sup>Mes</sup>DPM)H (1).

|                                             |                                                               |
|---------------------------------------------|---------------------------------------------------------------|
| Empirical formula                           | C <sub>36</sub> H <sub>38</sub> N <sub>2</sub>                |
| Formular weight                             | 498.68                                                        |
| Temperature / K                             | 100.0                                                         |
| Crystal system                              | monoclinic                                                    |
| Space group                                 | C2/c                                                          |
| a / Å                                       | 8.9174(7)                                                     |
| b / Å                                       | 15.1027(10)                                                   |
| c / Å                                       | 20.9603(17)                                                   |
| α / °                                       | 90                                                            |
| β / °                                       | 102.160(3)                                                    |
| γ / °                                       | 90                                                            |
| Volume / Å <sup>3</sup>                     | 2759.5(4)                                                     |
| Z                                           | 4                                                             |
| Density (calculated) / g/cm <sup>3</sup>    | 1.200                                                         |
| Absorption coefficient / mm <sup>-1</sup>   | 0.069                                                         |
| F(000)                                      | 1072.0                                                        |
| Crystal size / mm                           | 0.235 × 0.231 × 0.151                                         |
| Radiation / nm                              | MoKα (λ = 0.71073)                                            |
| 2θ range for data collection / °            | 5.394 to 63.056                                               |
| Index ranges                                | -12 ≤ h ≤ 13, -21 ≤ k ≤ 21, -30 ≤ l ≤ 30                      |
| Reflections collected                       | 36656                                                         |
| Independent reflections                     | 4534 [R <sub>int</sub> = 0.0624, R <sub>sigma</sub> = 0.0411] |
| Data/restraints/parameters                  | 4534/0/180                                                    |
| Goodness-of-fit on F <sup>2</sup> (GooF)    | 1.071                                                         |
| Final R indexes [I >= 2σ (I)]               | R <sub>1</sub> = 0.0513, wR <sub>2</sub> = 0.1227             |
| Final R indexes [all data]                  | R <sub>1</sub> = 0.0594, wR <sub>2</sub> = 0.1284             |
| Largest diff. peak/hole / e Å <sup>-3</sup> | 0.35/-0.25                                                    |

### 3.2 (<sup>Mes</sup>DPM)AlMe<sub>2</sub> (**2a**):

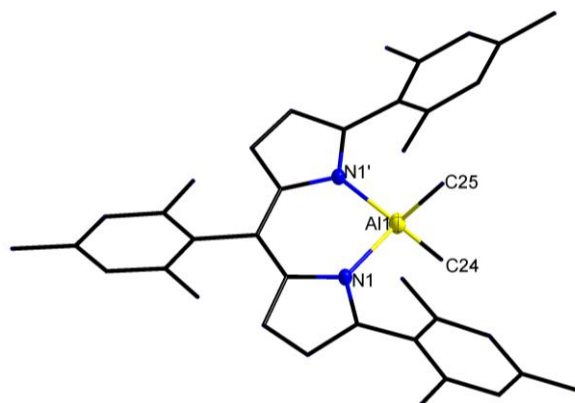

**Figure 50:** Solid-state molecular structure of (<sup>Mes</sup>DPM)AlMe<sub>2</sub> (**2a**) with thermal ellipsoids set at the 50% probability level (colour scheme: C = black; N = blue, Al = yellow). C atoms are depicted as wireframe, carbon-bound H atoms are omitted for clarity.

**Table 3:** Crystal data and structure refinement of (<sup>Mes</sup>DPM)AlMe<sub>2</sub> (**2a**).

|                                                                   |                                                                                             |
|-------------------------------------------------------------------|---------------------------------------------------------------------------------------------|
| Empirical formula                                                 | C <sub>38</sub> H <sub>43</sub> AlN <sub>2</sub>                                            |
| Formular weight                                                   | 554.72                                                                                      |
| Temperature / K                                                   | 100                                                                                         |
| Crystal system                                                    | monoclinic                                                                                  |
| Space group                                                       | <i>P</i> 2 <sub>1</sub> / <i>m</i>                                                          |
| <i>a</i> / Å                                                      | 8.0256(3)                                                                                   |
| <i>b</i> / Å                                                      | 14.3869(7)                                                                                  |
| <i>c</i> / Å                                                      | 14.5506(6)                                                                                  |
| $\alpha$ / °                                                      | 90                                                                                          |
| $\beta$ / °                                                       | 103.338(2)                                                                                  |
| $\gamma$ / °                                                      | 90                                                                                          |
| Volume / Å <sup>3</sup>                                           | 1634.74(12)                                                                                 |
| <i>Z</i>                                                          | 2                                                                                           |
| Density (calculated) / g/cm <sup>3</sup>                          | 1.127                                                                                       |
| Absorption coefficient / mm <sup>-1</sup>                         | 0.090                                                                                       |
| <i>F</i> (000)                                                    | 596.0                                                                                       |
| Crystal size / mm                                                 | 0.367x0.11x0.1                                                                              |
| Radiation / nm                                                    | MoK $\alpha$ ( $\lambda$ = 0.71073)                                                         |
| 2 $\theta$ range for data collection / °                          | 4.036 to 63.16                                                                              |
| Index ranges                                                      | -10 $\leq$ <i>h</i> $\leq$ 11, -21 $\leq$ <i>k</i> $\leq$ 21, -21 $\leq$ <i>l</i> $\leq$ 20 |
| Reflections collected                                             | 32186                                                                                       |
| Independent reflections                                           | 5610 [ <i>R</i> <sub>int</sub> = 0.0430, <i>R</i> <sub>sigma</sub> = 0.0329]                |
| Data/restraints/parameters                                        | 5610/0/213                                                                                  |
| Goodness-of-fit on <i>F</i> <sup>2</sup> (GooF)                   | 1.037                                                                                       |
| Final <i>R</i> indexes [ <i>I</i> $\geq$ 2 $\sigma$ ( <i>I</i> )] | <i>R</i> <sub>1</sub> = 0.0447, <i>wR</i> <sub>2</sub> = 0.1121                             |
| Final <i>R</i> indexes [all data]                                 | <i>R</i> <sub>1</sub> = 0.0622, <i>wR</i> <sub>2</sub> = 0.1221                             |
| Largest diff. peak/hole / e Å <sup>-3</sup>                       | 0.41/-0.30                                                                                  |

### 3.3 (<sup>Mes</sup>DPM)GaMe<sub>2</sub> (**3a**):

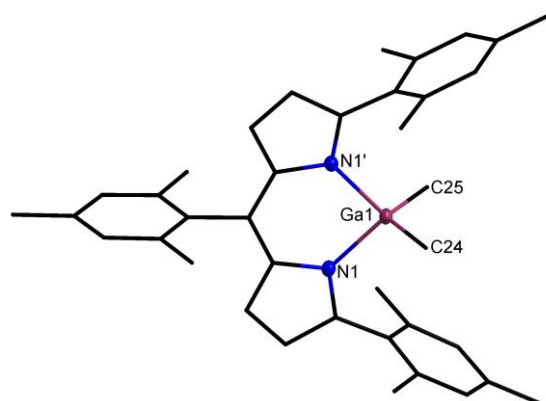

**Figure 51:** Solid-state molecular structure of (<sup>Mes</sup>DPM)GaMe<sub>2</sub> (**3a**) with thermal ellipsoids set at the 50% probability level (colour scheme: C = black; N = blue, Ga = violet). C atoms are depicted as wireframe, carbon-bound H atoms are omitted for clarity.

**Table 4:** Crystal data and structure refinement of (<sup>Mes</sup>DPM)GaMe<sub>2</sub> (**3a**).

|                                                              |                                                                              |
|--------------------------------------------------------------|------------------------------------------------------------------------------|
| Empirical formula                                            | C <sub>38</sub> H <sub>43</sub> GaN <sub>2</sub>                             |
| Formular weight                                              | 597.46                                                                       |
| Temperature / K                                              | 100.0                                                                        |
| Crystal system                                               | monoclinic                                                                   |
| Space group                                                  | <i>P</i> 2 <sub>1</sub> / <i>m</i>                                           |
| <i>a</i> / Å                                                 | 8.0255(3)                                                                    |
| <i>b</i> / Å                                                 | 14.4109(5)                                                                   |
| <i>c</i> / Å                                                 | 14.5282(6)                                                                   |
| $\alpha$ / °                                                 | 90                                                                           |
| $\beta$ / °                                                  | 103.255(2)                                                                   |
| $\gamma$ / °                                                 | 90                                                                           |
| Volume / Å <sup>3</sup>                                      | 1635.49(11)                                                                  |
| <i>Z</i>                                                     | 2                                                                            |
| Density (calculated) / g/cm <sup>3</sup>                     | 1.213                                                                        |
| Absorption coefficient / mm <sup>-1</sup>                    | 0.869                                                                        |
| <i>F</i> (000)                                               | 632.0                                                                        |
| Crystal size / mm                                            | 0.282 × 0.131 × 0.104                                                        |
| Radiation / nm                                               | MoK $\alpha$ ( $\lambda$ = 0.71073)                                          |
| 2 $\theta$ range for data collection / °                     | 5.214 to 71.362                                                              |
| Index ranges                                                 | -12 ≤ <i>h</i> ≤ 13, -23 ≤ <i>k</i> ≤ 23, -23 ≤ <i>l</i> ≤ 23                |
| Reflections collected                                        | 88361                                                                        |
| Independent reflections                                      | 7725 [ <i>R</i> <sub>int</sub> = 0.0458, <i>R</i> <sub>sigma</sub> = 0.0280] |
| Data/restraints/parameters                                   | 7725/0/213                                                                   |
| Goodness-of-fit on <i>F</i> <sup>2</sup> (GooF)              | 1.048                                                                        |
| Final <i>R</i> indexes [ <i>I</i> ≥ 2 $\sigma$ ( <i>I</i> )] | <i>R</i> <sub>1</sub> = 0.0367, <i>wR</i> <sub>2</sub> = 0.0833              |
| Final <i>R</i> indexes [all data]                            | <i>R</i> <sub>1</sub> = 0.0502, <i>wR</i> <sub>2</sub> = 0.0883              |
| Largest diff. peak/hole / e Å <sup>-3</sup>                  | 0.46/-0.50                                                                   |

### 3.4 (<sup>Mes</sup>DPM)InMe<sub>2</sub> (**4a**):

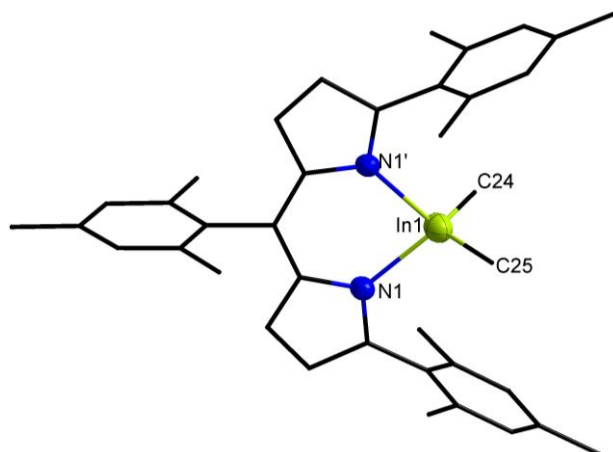

**Figure 52:** Solid-state molecular structure of (<sup>Mes</sup>DPM)InMe<sub>2</sub> (**4a**) with thermal ellipsoids set at the 50% probability level (colour scheme: C = black; N = blue, In = green). C atoms are depicted as wireframe, carbon-bound H atoms are omitted for clarity.

**Table 5:** Crystal data and structure refinement of (<sup>Mes</sup>DPM)InMe<sub>2</sub> (**4a**).

|                                                                   |                                                                                            |
|-------------------------------------------------------------------|--------------------------------------------------------------------------------------------|
| Empirical formula                                                 | C <sub>38</sub> H <sub>43</sub> InN <sub>2</sub>                                           |
| Formular weight                                                   | 642.56                                                                                     |
| Temperature / K                                                   | 100                                                                                        |
| Crystal system                                                    | Monoclinic                                                                                 |
| Space group                                                       | <i>P2<sub>1</sub>/m</i>                                                                    |
| <i>a</i> / Å                                                      | 8.0070(2)                                                                                  |
| <i>b</i> / Å                                                      | 14.4092(2)                                                                                 |
| <i>c</i> / Å                                                      | 14.7134(3)                                                                                 |
| $\alpha$ / °                                                      | 90                                                                                         |
| $\beta$ / °                                                       | 102.629(2)                                                                                 |
| $\gamma$ / °                                                      | 90                                                                                         |
| Volume / Å <sup>3</sup>                                           | 1656.48(6)                                                                                 |
| <i>Z</i>                                                          | 2                                                                                          |
| Density (calculated) / g/cm <sup>3</sup>                          | 1.288                                                                                      |
| Absorption coefficient / mm <sup>-1</sup>                         | 5.891                                                                                      |
| <i>F</i> (000)                                                    | 668.0                                                                                      |
| Crystal radius / mm <sup>3</sup>                                  | 0.0488                                                                                     |
| Radiation / nm                                                    | CuK $\alpha$ ( $\lambda$ = 1.54186)                                                        |
| 2 $\theta$ range for data collection / °                          | 6.156 to 151.916                                                                           |
| Index ranges                                                      | -10 $\leq$ <i>h</i> $\leq$ 8, -11 $\leq$ <i>k</i> $\leq$ 18, -18 $\leq$ <i>l</i> $\leq$ 18 |
| Reflections collected                                             | 29029                                                                                      |
| Independent reflections                                           | 3569 [ <i>R</i> <sub>int</sub> = 0.0497, <i>R</i> <sub>sigma</sub> = 0.0348]               |
| Data/restraints/parameters                                        | 3569/0/212                                                                                 |
| Goodness-of-fit on <i>F</i> <sup>2</sup> (GooF)                   | 1.099                                                                                      |
| Final <i>R</i> indexes [ <i>I</i> $\geq$ 2 $\sigma$ ( <i>I</i> )] | <i>R</i> <sub>1</sub> = 0.0446, <i>wR</i> <sub>2</sub> = 0.1185                            |
| Final <i>R</i> indexes [all data]                                 | <i>R</i> <sub>1</sub> = 0.0539, <i>wR</i> <sub>2</sub> = 0.1241                            |
| Largest diff. peak/hole / e Å <sup>-3</sup>                       | 0.38/-1.08                                                                                 |

3.5 (<sup>Mes</sup>DPM)AlEt<sub>2</sub> (**2b**):

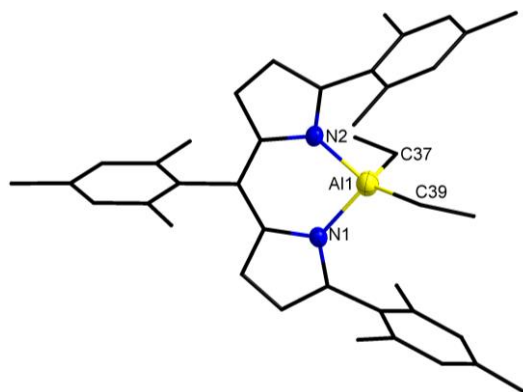

**Figure 53:** Solid-state molecular structure of (<sup>Mes</sup>DPM)AlEt<sub>2</sub> (**2b**) with thermal ellipsoids set at the 50% probability level (colour scheme: C = black; N = blue, Al = yellow). C atoms are depicted as wireframe, carbon-bound H atoms are omitted for clarity.

**Table 6:** Crystal data and structure refinement of (<sup>Mes</sup>DPM)AlEt<sub>2</sub> (**2b**).

|                                             |                                                                |
|---------------------------------------------|----------------------------------------------------------------|
| Empirical formula                           | C <sub>40</sub> H <sub>47</sub> AlN <sub>2</sub>               |
| Formular weight                             | 582.77                                                         |
| Temperature / K                             | 100.0                                                          |
| Crystal system                              | triclinic                                                      |
| Space group                                 | P-1                                                            |
| a / Å                                       | 8.259(3)                                                       |
| b / Å                                       | 14.610(6)                                                      |
| c / Å                                       | 14.774(6)                                                      |
| α / °                                       | 89.10(3)                                                       |
| β / °                                       | 73.44(3)                                                       |
| γ / °                                       | 87.79(3)                                                       |
| Volume / Å <sup>3</sup>                     | 1707.6(12)                                                     |
| Z                                           | 2                                                              |
| Density (calculated) / g/cm <sup>3</sup>    | 1.133                                                          |
| Absorption coefficient / mm <sup>-1</sup>   | 0.725                                                          |
| F(000)                                      | 628.0                                                          |
| Crystal radius / mm                         | 0.0295                                                         |
| Radiation / nm                              | CuKα (λ = 1.54186)                                             |
| 2θ range for data collection / °            | 8.678 to 152.6                                                 |
| Index ranges                                | -10 ≤ h ≤ 10, -15 ≤ k ≤ 18, -18 ≤ l ≤ 18                       |
| Reflections collected                       | 59116                                                          |
| Independent reflections                     | 59116 [R <sub>int</sub> = 0.1119, R <sub>sigma</sub> = 0.2117] |
| Data/restraints/parameters                  | 59116/0/401                                                    |
| Goodness-of-fit on F <sup>2</sup> (Goof)    | 0.745                                                          |
| Final R indexes [I ≥ 2σ (I)]                | R <sub>1</sub> = 0.0609, wR <sub>2</sub> = 0.1163              |
| Final R indexes [all data]                  | R <sub>1</sub> = 0.1487, wR <sub>2</sub> = 0.1422              |
| Largest diff. peak/hole / e Å <sup>-3</sup> | 0.33/-0.35                                                     |



3.6 (<sup>Mes</sup>DPM)GaEt<sub>2</sub> (**3b**):

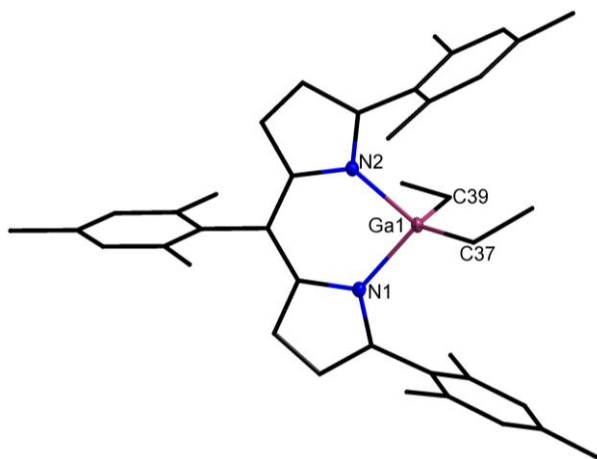

Figure 54: Solid-state molecular structure of (<sup>Mes</sup>DPM)GaEt<sub>2</sub> (**3b**) with thermal ellipsoids set at the 50% probability level (colour scheme: C = black; N = blue, Ga = violet). C atoms are depicted as wireframe, carbon-bound H atoms are omitted for clarity.

Table 7: Crystal data and structure refinement of (<sup>Mes</sup>DPM)GaEt<sub>2</sub> (**3b**).

|                                                              |                                                                              |
|--------------------------------------------------------------|------------------------------------------------------------------------------|
| Empirical formula                                            | C <sub>40</sub> H <sub>47</sub> GaN <sub>2</sub>                             |
| Formular weight                                              | 625.51                                                                       |
| Temperature / K                                              | 100                                                                          |
| Crystal system                                               | triclinic                                                                    |
| Space group                                                  | <i>P</i> -1                                                                  |
| <i>a</i> / Å                                                 | 8.254(4)                                                                     |
| <i>b</i> / Å                                                 | 14.620(6)                                                                    |
| <i>c</i> / Å                                                 | 14.709(7)                                                                    |
| $\alpha$ / °                                                 | 89.79(2)                                                                     |
| $\beta$ / °                                                  | 74.07(2)                                                                     |
| $\gamma$ / °                                                 | 87.68(2)                                                                     |
| Volume / Å <sup>3</sup>                                      | 1705.5(14)                                                                   |
| <i>Z</i>                                                     | 2                                                                            |
| Density (calculated) / g/cm <sup>3</sup>                     | 1.218                                                                        |
| Absorption coefficient / mm <sup>-1</sup>                    | 0.836                                                                        |
| <i>F</i> (000)                                               | 664.0                                                                        |
| Crystal size / mm                                            | 0.233 × 0.118 × 0.117                                                        |
| Radiation / nm                                               | MoK $\alpha$ ( $\lambda$ = 0.71073)                                          |
| 2 $\theta$ range for data collection / °                     | 5.578 to 56.774                                                              |
| Index ranges                                                 | -10 ≤ <i>h</i> ≤ 11, -19 ≤ <i>k</i> ≤ 19, 0 ≤ <i>l</i> ≤ 19                  |
| Reflections collected                                        | 8457                                                                         |
| Independent reflections                                      | 8457 [ <i>R</i> <sub>int</sub> = 0.0308, <i>R</i> <sub>sigma</sub> = 0.0284] |
| Data/restraints/parameters                                   | 8457/0/400                                                                   |
| Goodness-of-fit on <i>F</i> <sup>2</sup> (Goof)              | 1.054                                                                        |
| Final <i>R</i> indexes [ <i>I</i> ≥ 2 $\sigma$ ( <i>I</i> )] | <i>R</i> <sub>1</sub> = 0.0323, <i>wR</i> <sub>2</sub> = 0.0822              |
| Final <i>R</i> indexes [all data]                            | <i>R</i> <sub>1</sub> = 0.0363, <i>wR</i> <sub>2</sub> = 0.0848              |
| Largest diff. peak/hole / e Å <sup>-3</sup>                  | 0.44/-0.36                                                                   |

3.7 (<sup>Mes</sup>DPM)InEt<sub>2</sub> (**4b**):

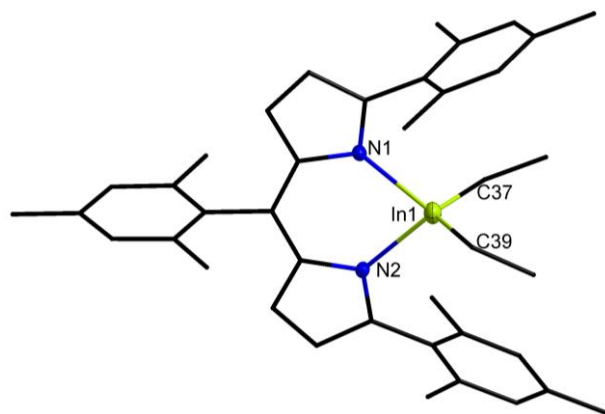

**Figure 55:** Solid-state molecular structure of (<sup>Mes</sup>DPM)InEt<sub>2</sub> (**4b**) with thermal ellipsoids set at the 50% probability level (colour scheme: C = black; N = blue, In = green). C atoms are depicted as wireframe, carbon-bound H atoms are omitted for clarity.

**Table 8:** Crystal data and structure refinement of (<sup>Mes</sup>DPM)InEt<sub>2</sub> (**4b**).

|                                                      |                                                               |
|------------------------------------------------------|---------------------------------------------------------------|
| Empirical formula                                    | C <sub>40</sub> H <sub>47</sub> InN <sub>2</sub>              |
| Formular weight                                      | 670.61                                                        |
| Temperature / K                                      | 100                                                           |
| Crystal system                                       | monoclinic                                                    |
| Space group                                          | <i>P</i> 2 <sub>1</sub> / <i>c</i>                            |
| <i>a</i> / Å                                         | 15.6677(6)                                                    |
| <i>b</i> / Å                                         | 14.3638(5)                                                    |
| <i>c</i> / Å                                         | 16.0349(5)                                                    |
| α / °                                                | 90                                                            |
| β / °                                                | 105.4440(10)                                                  |
| γ / °                                                | 90                                                            |
| Volume / Å <sup>3</sup>                              | 3478.3(2)                                                     |
| <i>Z</i>                                             | 4                                                             |
| Density (calculated) / g/cm <sup>3</sup>             | 1.281                                                         |
| Absorption coefficient / mm <sup>-1</sup>            | 0.708                                                         |
| <i>F</i> (000)                                       | 1400.0                                                        |
| Crystal size / mm                                    | 0.1 × 0.1 × 0.1                                               |
| Radiation / nm                                       | MoKα (λ = 0.71073)                                            |
| 2θ range for data collection / °                     | 3.872 to 51.998                                               |
| Index ranges                                         | -19 ≤ <i>h</i> ≤ 19, -17 ≤ <i>k</i> ≤ 17, -19 ≤ <i>l</i> ≤ 19 |
| Reflections collected                                | 46401                                                         |
| Independent reflections                              | 6842 [R <sub>int</sub> = 0.0458, R <sub>sigma</sub> = 0.0305] |
| Data/restraints/parameters                           | 6842/0/399                                                    |
| Goodness-of-fit on <i>F</i> <sup>2</sup> (GooF)      | 1.047                                                         |
| Final <i>R</i> indexes [ <i>I</i> ≥ 2σ ( <i>I</i> )] | R <sub>1</sub> = 0.0362, wR <sub>2</sub> = 0.0955             |
| Final <i>R</i> indexes [all data]                    | R <sub>1</sub> = 0.0471, wR <sub>2</sub> = 0.0998             |
| Largest diff. peak/hole / e Å <sup>-3</sup>          | 0.79/-0.74                                                    |

4. XYZ coordinates of 2a, 3a and 4a obtained from geometry optimisation by the r2scan-3c method.

2a (Al):

|    |              |              |              |
|----|--------------|--------------|--------------|
| Al | -0.618176000 | 10.789520000 | 10.451423000 |
| N  | -0.047570000 | 12.206939000 | 9.250686000  |
| N  | -0.044931000 | 9.374644000  | 9.249035000  |
| C  | 0.443199000  | 10.790175000 | 12.118378000 |
| C  | -2.580791000 | 10.787100000 | 10.684085000 |
| C  | -0.144664000 | 13.537479000 | 9.458109000  |
| C  | 0.551892000  | 12.033435000 | 8.000722000  |
| C  | -0.141682000 | 8.043637000  | 9.453861000  |
| C  | 0.552304000  | 9.550734000  | 7.998383000  |
| H  | 1.528854000  | 10.791436000 | 11.960769000 |
| H  | 0.200707000  | 9.906531000  | 12.723290000 |
| H  | 0.198682000  | 11.672449000 | 12.724440000 |
| H  | -2.894280000 | 9.903734000  | 11.255811000 |
| H  | -2.895761000 | 11.669847000 | 11.256023000 |
| H  | -3.145489000 | 10.786855000 | 9.743620000  |
| C  | 0.383715000  | 14.250211000 | 8.356889000  |
| C  | -0.730361000 | 14.102090000 | 10.692866000 |
| C  | 0.820831000  | 13.310036000 | 7.443093000  |
| C  | 0.831995000  | 10.792713000 | 7.420648000  |
| C  | 0.384118000  | 7.333216000  | 8.349985000  |
| C  | -0.723942000 | 7.476611000  | 10.689133000 |
| C  | 0.819504000  | 8.275323000  | 7.437285000  |
| H  | 0.424274000  | 15.328151000 | 8.275586000  |
| C  | 0.100003000  | 14.385368000 | 11.790005000 |
| C  | -2.106008000 | 14.380179000 | 10.747293000 |
| H  | 1.283409000  | 13.481063000 | 6.480122000  |
| C  | 1.486294000  | 10.793817000 | 6.079300000  |
| H  | 0.424340000  | 6.255447000  | 8.266284000  |
| C  | 0.109100000  | 7.195444000  | 11.784855000 |
| C  | -2.098566000 | 7.194169000  | 10.745626000 |
| H  | 1.280183000  | 8.106358000  | 6.473086000  |
| C  | -0.472929000 | 14.904758000 | 12.950286000 |
| C  | 1.585828000  | 14.163606000 | 11.707332000 |
| C  | -2.640870000 | 14.899769000 | 11.925620000 |
| C  | -2.984778000 | 14.153416000 | 9.547144000  |
| C  | 2.886608000  | 10.789780000 | 5.992713000  |
| C  | 0.695352000  | 10.805309000 | 4.920376000  |
| C  | -0.460472000 | 6.673678000  | 12.945702000 |
| C  | 1.594153000  | 7.421294000  | 11.699977000 |
| C  | -2.630048000 | 6.672323000  | 11.924483000 |
| C  | -2.979771000 | 7.419349000  | 9.546925000  |
| H  | 0.166481000  | 15.114185000 | 13.805892000 |
| C  | -1.841925000 | 15.157727000 | 13.039645000 |
| H  | 1.822301000  | 13.193598000 | 11.260723000 |
| H  | 2.043342000  | 14.209227000 | 12.699089000 |
| H  | 2.055802000  | 14.931559000 | 11.080398000 |
| H  | -3.708539000 | 15.105817000 | 11.974108000 |
| H  | -2.801678000 | 14.920702000 | 8.784598000  |
| H  | -4.041405000 | 14.196086000 | 9.824025000  |
| H  | -2.787164000 | 13.183063000 | 9.082707000  |

|   |              |              |              |
|---|--------------|--------------|--------------|
| C | 3.480079000  | 10.795027000 | 4.729764000  |
| C | 3.736809000  | 10.785934000 | 7.234347000  |
| C | 1.327715000  | 10.810052000 | 3.676920000  |
| C | -0.806791000 | 10.817945000 | 5.011912000  |
| H | 0.180960000  | 6.465736000  | 13.800172000 |
| C | -1.828537000 | 6.416322000  | 13.037098000 |
| H | 1.827620000  | 8.392362000  | 11.254085000 |
| H | 2.053203000  | 7.375733000  | 12.691019000 |
| H | 2.065146000  | 6.655259000  | 11.071433000 |
| H | -3.696988000 | 6.462929000  | 11.974549000 |
| H | -2.795286000 | 6.653463000  | 8.783335000  |
| H | -4.035934000 | 7.373151000  | 9.825060000  |
| H | -2.785700000 | 8.390845000  | 9.083324000  |
| C | -2.446748000 | 15.672952000 | 14.317050000 |
| H | 4.566157000  | 10.795504000 | 4.658706000  |
| C | 2.717872000  | 10.801843000 | 3.561987000  |
| H | 3.527541000  | 9.906019000  | 7.853502000  |
| H | 3.534108000  | 11.666961000 | 7.854241000  |
| H | 4.798906000  | 10.782170000 | 6.977988000  |
| H | 0.716865000  | 10.821884000 | 2.776098000  |
| H | -1.257848000 | 10.808362000 | 4.016761000  |
| H | -1.176086000 | 9.948052000  | 5.567171000  |
| H | -1.162185000 | 11.708296000 | 5.543531000  |
| C | -2.429504000 | 5.898474000  | 14.315251000 |
| H | -2.748428000 | 14.839965000 | 14.964226000 |
| H | -3.338986000 | 16.274541000 | 14.120221000 |
| H | -1.731944000 | 16.281986000 | 14.878178000 |
| C | 3.377521000  | 10.771870000 | 2.209897000  |
| H | -2.729596000 | 6.730128000  | 14.964874000 |
| H | -3.322043000 | 5.296887000  | 14.119841000 |
| H | -1.712865000 | 5.288685000  | 14.873233000 |
| H | 3.485293000  | 9.739495000  | 1.854569000  |
| H | 2.784407000  | 11.312809000 | 1.466501000  |
| H | 4.37774000   | 11.213047000 | 2.245492000  |

**3a (Ga):**

|    |              |              |              |
|----|--------------|--------------|--------------|
| Fe | 1.224199000  | 11.849015000 | 12.704421000 |
| N  | 2.077083000  | 12.737995000 | 13.904459000 |
| N  | 0.076954000  | 10.356882000 | 13.050284000 |
| N  | 1.420939000  | 12.504136000 | 10.957242000 |
| Si | 2.953895000  | 12.371393000 | 10.147140000 |
| C  | 3.919194000  | 13.989081000 | 10.084351000 |
| C  | 3.984680000  | 11.066049000 | 11.035725000 |
| C  | 2.711347000  | 11.831338000 | 8.356164000  |
| Si | 0.001699000  | 13.320959000 | 10.363126000 |
| C  | -0.996607000 | 12.236895000 | 9.196314000  |
| C  | 0.452881000  | 14.921414000 | 9.476626000  |
| C  | -1.102975000 | 13.755193000 | 11.828419000 |
| Si | 0.340339000  | 8.848387000  | 12.208902000 |
| C  | 0.622932000  | 9.091829000  | 10.365299000 |
| C  | -1.113977000 | 7.649242000  | 12.319193000 |
| C  | 1.856372000  | 7.997170000  | 12.941185000 |
| Si | -0.924361000 | 10.423422000 | 14.481810000 |

|   |              |              |              |
|---|--------------|--------------|--------------|
| C | -0.453628000 | 9.094051000  | 15.736025000 |
| C | -0.758259000 | 12.060826000 | 15.400037000 |
| C | -2.748008000 | 10.247315000 | 14.032596000 |
| C | 2.866327000  | 13.821311000 | 14.377942000 |
| C | 2.391146000  | 15.136157000 | 13.728462000 |
| C | 2.656550000  | 13.903364000 | 15.909492000 |
| C | 4.360333000  | 13.580799000 | 14.086909000 |
| H | -0.381436000 | 11.835029000 | 8.384271000  |
| H | -1.820605000 | 12.804933000 | 8.748097000  |
| H | -1.427400000 | 11.389993000 | 9.741069000  |
| H | 3.406778000  | 14.727859000 | 9.458938000  |
| H | 4.909324000  | 13.816206000 | 9.644885000  |
| H | 4.068481000  | 14.439273000 | 11.069966000 |
| H | 4.064770000  | 11.254484000 | 12.113766000 |
| H | 5.005488000  | 11.050982000 | 10.635364000 |
| H | 3.564212000  | 10.063472000 | 10.896922000 |
| H | 2.464687000  | 15.070791000 | 12.638661000 |
| H | 3.004117000  | 15.975987000 | 14.075470000 |
| H | 1.347391000  | 15.331085000 | 13.993173000 |
| H | 1.609965000  | 14.115667000 | 16.143664000 |
| H | 3.280696000  | 14.707124000 | 16.315551000 |
| H | 2.943088000  | 12.961256000 | 16.386278000 |
| H | 1.020568000  | 15.594118000 | 10.129067000 |
| H | -0.460179000 | 15.443692000 | 9.166560000  |
| H | 1.049071000  | 14.743822000 | 8.574957000  |
| H | 2.188136000  | 10.872656000 | 8.281473000  |
| H | 3.685778000  | 11.722762000 | 7.864572000  |
| H | 2.138680000  | 12.571233000 | 7.785396000  |
| H | -0.555595000 | 8.075817000  | 15.348354000 |
| H | -1.089651000 | 9.174225000  | 16.625907000 |
| H | 0.586104000  | 9.226672000  | 16.057165000 |
| H | -0.323141000 | 9.275169000  | 9.845207000  |
| H | 1.067689000  | 8.184320000  | 9.939038000  |
| H | 1.281879000  | 9.933602000  | 10.144536000 |
| H | 0.233522000  | 12.159694000 | 15.850149000 |
| H | -1.502802000 | 12.076986000 | 16.205950000 |
| H | -0.931157000 | 12.941961000 | 14.773271000 |
| H | -1.491042000 | 12.859226000 | 12.327948000 |
| H | -1.972152000 | 14.324127000 | 11.475796000 |
| H | -0.584130000 | 14.373241000 | 12.570338000 |
| H | 4.692559000  | 12.650438000 | 14.557800000 |
| H | 4.965441000  | 14.407057000 | 14.477074000 |
| H | 4.534927000  | 13.503325000 | 13.010501000 |
| H | -1.388439000 | 7.359659000  | 13.337574000 |
| H | -0.837864000 | 6.732579000  | 11.782689000 |
| H | -2.003511000 | 8.058929000  | 11.828608000 |
| H | 2.745687000  | 8.634610000  | 12.867947000 |
| H | 2.075041000  | 7.056452000  | 12.421937000 |
| H | 1.704122000  | 7.771383000  | 14.002350000 |
| H | -3.037352000 | 10.981823000 | 13.272135000 |
| H | -3.369804000 | 10.423837000 | 14.918634000 |
| H | -2.992993000 | 9.254050000  | 13.646548000 |

**4a (ln):**

|    |              |              |              |
|----|--------------|--------------|--------------|
| In | 0.000743000  | 0.000974000  | -0.004596000 |
| N  | 1.672481000  | 1.480513000  | 0.007939000  |
| N  | 1.672535000  | -1.478513000 | 0.007357000  |
| C  | -0.937175000 | 0.000581000  | 1.952276000  |
| C  | -0.902423000 | 0.001298000  | -1.977816000 |
| C  | 1.484130000  | 2.809198000  | 0.006820000  |
| C  | 3.046889000  | 1.256080000  | 0.016104000  |
| C  | 1.484255000  | -2.807226000 | 0.005707000  |
| C  | 3.046922000  | -1.254017000 | 0.015736000  |
| H  | -0.179515000 | 0.000436000  | 2.740764000  |
| H  | -1.563113000 | -0.889770000 | 2.061678000  |
| H  | -1.563015000 | 0.890975000  | 2.061922000  |
| H  | -1.526220000 | -0.889092000 | -2.099156000 |
| H  | -1.526547000 | 0.891489000  | -2.098863000 |
| H  | -0.130851000 | 0.001571000  | -2.752772000 |
| C  | 2.727316000  | 3.491297000  | 0.014166000  |
| C  | 0.117458000  | 3.374956000  | -0.002233000 |
| C  | 3.708155000  | 2.518357000  | 0.019967000  |
| C  | 3.669862000  | 0.001060000  | 0.019001000  |
| C  | 2.727449000  | -3.489260000 | 0.012985000  |
| C  | 0.117686000  | -3.373188000 | -0.003983000 |
| C  | 3.708242000  | -2.516252000 | 0.019145000  |
| H  | 2.855094000  | 4.565755000  | 0.015069000  |
| C  | -0.541722000 | 3.627082000  | 1.212788000  |
| C  | -0.519357000 | 3.639580000  | -1.226906000 |
| H  | 4.781047000  | 2.658622000  | 0.026630000  |
| C  | 5.165061000  | 0.000592000  | 0.025629000  |
| H  | 2.855272000  | -4.563713000 | 0.013547000  |
| C  | -0.541911000 | -3.625905000 | 1.210683000  |
| C  | -0.518512000 | -3.637668000 | -1.229011000 |
| H  | 4.781106000  | -2.656456000 | 0.025850000  |
| C  | -1.847067000 | 4.117809000  | 1.182208000  |
| C  | 0.155340000  | 3.399284000  | 2.526874000  |
| C  | -1.824562000 | 4.130336000  | -1.215729000 |
| C  | 0.201791000  | 3.420393000  | -2.529388000 |
| C  | 5.854301000  | 0.002666000  | 1.247302000  |
| C  | 5.864545000  | 0.003115000  | -1.190673000 |
| C  | -1.847085000 | -4.117044000 | 1.179387000  |
| C  | 0.154600000  | -3.398534000 | 2.525134000  |
| C  | -1.823546000 | -4.128887000 | -1.218552000 |
| C  | 0.203159000  | -3.417703000 | -2.531072000 |
| H  | -2.361715000 | 4.307650000  | 2.122428000  |
| C  | -2.506226000 | 4.367257000  | -0.021564000 |
| H  | 0.680851000  | 2.439722000  | 2.542159000  |
| H  | -0.558020000 | 3.417637000  | 3.355028000  |
| H  | 0.905518000  | 4.179322000  | 2.706680000  |
| H  | -2.321715000 | 4.329887000  | -2.163341000 |
| H  | 0.978440000  | 4.181212000  | -2.675028000 |
| H  | -0.491066000 | 3.475474000  | -3.373090000 |
| H  | 0.700349000  | 2.446486000  | -2.552326000 |
| C  | 7.249867000  | 0.005331000  | 1.231639000  |
| C  | 5.108904000  | 0.006250000  | 2.554510000  |

|   |              |              |              |
|---|--------------|--------------|--------------|
| C | 7.259491000  | 0.005854000  | -1.163708000 |
| C | 5.129399000  | 0.007156000  | -2.503692000 |
| H | -2.362059000 | -4.307391000 | 2.119330000  |
| C | -2.505635000 | -4.366384000 | -0.024741000 |
| H | 0.680461000  | -2.439178000 | 2.540818000  |
| H | -0.559174000 | -3.416747000 | 3.352934000  |
| H | 0.904384000  | -4.178892000 | 2.705207000  |
| H | -2.320211000 | -4.328382000 | -2.166429000 |
| H | 0.981820000  | -4.176685000 | -2.675477000 |
| H | -0.488845000 | -3.475019000 | -3.375317000 |
| H | 0.699402000  | -2.442606000 | -2.554250000 |
| C | -3.930109000 | 4.852965000  | -0.032981000 |
| H | 7.786887000  | 0.010385000  | 2.178374000  |
| C | 7.969125000  | 0.003612000  | 0.037064000  |
| H | 4.460528000  | -0.873248000 | 2.641427000  |
| H | 4.462597000  | 0.887577000  | 2.638353000  |
| H | 5.803729000  | 0.006837000  | 3.397920000  |
| H | 7.804199000  | 0.011305000  | -2.106126000 |
| H | 5.830691000  | 0.007868000  | -3.341737000 |
| H | 4.481576000  | -0.872228000 | -2.595771000 |
| H | 4.483837000  | 0.888567000  | -2.592222000 |
| C | -3.929312000 | -4.852682000 | -0.036857000 |
| H | -4.626845000 | 4.006010000  | -0.064752000 |
| H | -4.130837000 | 5.474727000  | -0.910444000 |
| H | -4.159571000 | 5.433035000  | 0.865580000  |
| C | 9.473677000  | -0.029564000 | 0.041864000  |
| H | -4.626435000 | -4.005972000 | -0.066551000 |
| H | -4.129994000 | -5.472629000 | -0.915605000 |
| H | -4.158279000 | -5.434804000 | 0.860509000  |
| H | 9.838401000  | -1.063199000 | -0.005212000 |
| H | 9.885603000  | 0.501726000  | -0.821352000 |
| H | 9.878386000  | 0.420468000  | 0.953000000  |
